# 1 Zika virus infection as a cause of congenital brain abnormalities and 2 Guillain-Barré syndrome: systematic review

3

4 Fabienne Krauer,<sup>1</sup> Maurane Riesen,<sup>1</sup> Ludovic Reveiz,<sup>2</sup> Olufemi T Oladapo,<sup>3</sup> Ruth Martínez-Vega,<sup>4</sup>  
5 Teegwendé V. Porgo,<sup>3,5</sup> Anina Haefliger,<sup>1</sup> Nathalie J Broutet,<sup>3</sup> Nicola Low,<sup>1</sup> for the WHO Zika Causality  
6 Working Group<sup>6</sup>

7

8 1. Institute of Social and Preventive Medicine, University of Bern, Switzerland

9 2. Pan American Health Organization, Washington DC, United States of America

10 3. UNDP/UNFPA/UNICEF/WHO/World Bank Special Programme of Research, Development and  
11 Research Training in Human Reproduction (HRP), Department of Reproductive Health and  
12 Research World Health Organization, Geneva, Switzerland

13 4. Escuela de Microbiología, Universidad Nacional de Santander, Santander, Colombia

14 5. Department of Social and Preventative Medicine, Laval University, Québec, Canada

15 6. Members listed at the end of the manuscript

16

17 Contact: Nicola Low, Professor of Epidemiology and Public Health, Institute of Social and Preventive  
18 Medicine, University of Bern, Finkenhubelweg 11, Bern, CH-3012, Switzerland.

19 Email, [nicola.low@ispm.unibe.ch](mailto:nicola.low@ispm.unibe.ch)

20

21

22

23

24

25 Word counts:

26 Abstract, 480; Main text 7753: Introduction, 711; Methods, 1032; Results, 4253; Discussion, 1857  
27 words

28 Tables, 5

29 References: 163

30 Supplementary online material: 1 Supplementary text file (includes supplementary background,  
31 methods, results); 2 supplementary tables (extended evidence summaries and quality assessments)

## 32 Abstract

### 33 Background

34 The World Health Organization stated in March 2016 that there was scientific consensus that the  
35 mosquito-borne Zika virus was a cause of the neurological disorder Guillain-Barré syndrome and of  
36 microcephaly and other congenital brain abnormalities, based on rapid evidence assessments.  
37 Decisions about causality require systematic assessment to guide public health actions. The  
38 objectives of this study were: to update and re-assess the evidence for causality through a rapid and  
39 systematic review about links between Zika virus infection and a) congenital brain abnormalities,  
40 including microcephaly, in the foetuses and offspring of pregnant women and b) Guillain-Barré  
41 syndrome in any population; and to describe the process and outcomes of an expert assessment of  
42 the evidence about causality.

### 43 Methods and findings

44 The study had three linked components. First, in February 2016, we developed a causality framework  
45 that defined questions about the relationship between Zika virus infection and each of the two  
46 clinical outcomes in 10 dimensions; temporality, biological plausibility, strength of association,  
47 alternative explanations, cessation, dose-response, animal experiments, analogy, specificity and  
48 consistency. Second, we did a systematic review (protocol number CRD42016036693). We searched  
49 multiple online sources up to May 30, 2016 to find studies that directly addressed either outcome  
50 and any causality dimension, used methods to expedite study selection, data extraction and quality  
51 assessment, and summarised evidence descriptively. Third, a multidisciplinary panel of experts  
52 assessed the review findings and reached consensus on causality. We found 1091 unique items up to  
53 May 30, 2016. For congenital brain abnormalities, including microcephaly, we included 72 items; for  
54 eight of 10 causality dimensions (all except dose-response relationship and specificity) we found that  
55 more than half the relevant studies supported a causal association with Zika virus infection. For  
56 Guillain-Barré syndrome, we included 36 items, of which more than half the relevant studies  
57 supported a causal association in seven of ten dimensions (all except dose-response relationship,  
58 specificity and animal experimental evidence). Articles identified non-systematically from May 30-  
59 July 29, 2016 strengthened the review findings. The expert panel concluded that: a) the most likely  
60 explanation of available evidence from outbreaks of Zika virus infection and clusters of microcephaly  
61 is that Zika virus infection during pregnancy is a cause of congenital brain abnormalities including  
62 microcephaly; and b) the most likely explanation of available evidence from outbreaks of Zika virus  
63 infection and Guillain-Barré syndrome is that Zika virus infection is a trigger of Guillain-Barré  
64 syndrome. The expert panel recognised that Zika virus alone may not be sufficient to cause either  
65 congenital brain abnormalities or Guillain-Barré syndrome but agreed that the evidence was

66 sufficient to recommend increased public health measures. Weaknesses are the limited assessment  
67 of the role of dengue virus and other possible co-factors, the small number of comparative  
68 epidemiological studies, and the difficulty in keeping the review up to date with the pace of  
69 publication of new research.

## 70 Conclusions

71 Rapid and systematic reviews with frequent updating and open dissemination are now needed, both  
72 for appraisal of the evidence about Zika virus infection and for the next public health threats that will  
73 emerge. This rapid systematic review found sufficient evidence to say that Zika virus is a cause of  
74 congenital abnormalities and is a trigger of Guillain-Barré situation.

## 75 Introduction

76 An “explosive pandemic of Zika virus infection” [1] in 2015 caught the world by surprise. The  
77 PanAmerican Health Organization (PAHO) and World Health Organization (WHO) published an alert  
78 about increasing numbers of reports of “congenital anomalies, Guillain-Barré syndrome, and other  
79 neurological and autoimmune syndromes in areas where Zika virus is circulating and their possible  
80 relation to the virus” on December 1, 2015 [2]. On February 1, 2016, WHO declared that the clusters  
81 of microcephaly and other neurological disorders constituted a Public Health Emergency of  
82 International Concern [3]. Microcephaly at birth is a clinical finding indicative of reduced brain  
83 volume and can include other microscopic or macroscopic brain malformations resulting from a  
84 failure of neurogenesis [4]. Infections acquired in pregnancy, like cytomegalovirus, toxoplasmosis and  
85 rubella are established causes, and the extent and type of lesions depend on gestational stage at  
86 exposure [4]. Guillain-Barré syndrome is an immune-mediated rapidly progressing ascending flaccid  
87 paralysis, which typically occurs within a month of a bacterial or viral infection, such as  
88 *Campylobacter jejuni* and cytomegalovirus [5]. As of August 3, 2016, 65 countries in the Americas,  
89 Africa, South East Asia and Western Pacific regions have reported autochthonous transmission of the  
90 mosquito-borne flavivirus Zika since 2015 and 15 of these have reported cases of congenital brain  
91 abnormalities or Guillain-Barré syndrome or both [6]. The emergency committee of the International  
92 Health Regulations recommended increased research [3] to provide more rigorous scientific evidence  
93 of a causal relationship as a basis for the global health response to the current and future outbreaks.

94 Unexplained clusters of rare but serious conditions require urgent assessment of causality, balancing  
95 speed with systematic appraisal, so that public health actions can be implemented to reduce  
96 exposure to the suspected cause. Astute clinicians have often highlighted the first signals of new  
97 causes of disease in case reports [7]. But case reports are very rarely accepted as sufficient evidence  
98 of causality and need to be corroborated or refuted in a variety of different study designs [8, 9] (S1  
99 Text, S1 Figure). Bradford Hill is widely credited for his proposed framework for thinking about  
100 causality in epidemiology in 1965, which listed nine “viewpoints” from which to study associations  
101 between exposure and disease (S1 Text, S1 Table) [10]. Since then others have modified and  
102 generalised the list so that it can be applied to any putative causal relationship [11] (S1 Text, p2).  
103 Bradford Hill emphasised that his viewpoints were not rules and could not prove causation beyond  
104 doubt but, taken together, the body of evidence should be used to decide whether there is any other  
105 more likely explanation than cause and effect.

106 The level of certainty required before judging that Zika virus is a cause of microcephaly and Guillain-  
107 Barré syndrome is contentious [12]. Most assessments have been based on rapid but non-systematic

108 appraisals [13-15]. Based on rapid reviews, WHO has stated that there is “scientific consensus that  
109 Zika virus is a cause of microcephaly and Guillain-Barré syndrome” since March 31, 2016 [16]. On  
110 April 13, the conclusion of a narrative review was “that sufficient evidence has accumulated to infer a  
111 causal relationship between prenatal Zika virus infection and microcephaly and other severe brain  
112 anomalies” [14]. Narrative reviews can be done quickly but typically do not describe methods for  
113 searching and selecting which studies to include, for extracting data or for assessing the  
114 methodological quality of studies. Systematic reviews typically take at least six months to complete  
115 [17], but specify research questions and methods in advance so appraisal of the evidence is more  
116 transparent and gaps in evidence can be identified [18]. Evidence about the causal relationship  
117 between Zika virus infection and Guillain-Barré syndrome has not yet been assessed. We described a  
118 causality framework for Zika virus and plans for a systematic review (S1 Text), with a preliminary  
119 overview of 21 studies about microcephaly and Guillain-Barré syndrome, published up to March 4,  
120 2016 [19]. The objectives of this study are to re-assess the evidence for causality and update the  
121 WHO position through a rapid and systematic review about links between Zika virus infection and a)  
122 congenital brain abnormalities, including microcephaly, in the foetuses and offspring of pregnant  
123 women and b) Guillain-Barré syndrome in any population; and to describe the process and outcomes  
124 of an expert assessment of the evidence about causality.

## 125 [Methods](#)

126 We describe three linked components: the causality framework for Zika virus infection, the  
127 systematic reviews and the expert panel assessment of the review findings.

### 128 [Zika causality framework](#)

129 In February 2016, we developed a causality framework for Zika virus infection by defining specific  
130 questions for each of 10 causality dimensions, modified from Bradford Hill’s list (S1 Text): temporality  
131 (cause precedes effect); biological plausibility of proposed biological mechanisms; strength of  
132 association; exclusion of alternative explanations; cessation (reversal of an effect by experimental  
133 removal of, or observed decline in, the exposure); dose-response relationship; experimental  
134 evidence from animal studies; analogous cause-and-effect relationships found in other diseases;  
135 specificity of the effect; and the consistency of findings across different study types, populations and  
136 times. This review covered 35 questions about congenital brain abnormalities, including  
137 microcephaly and 26 questions about Guillain-Barré syndrome. We plan in future to examine a third  
138 group of other acute neurological disorders (S1 Text, S2 Table). We also listed seven groups of co-  
139 factors, including concurrent or previous dengue virus infection that might increase the risk of an  
140 outcome in the presence of Zika virus infection [20].

## 141 Systematic review

142 Our protocol was registered on March 21, 2016 in the international database PROSPERO (number  
143 CRD42016036693) [21] and structured according to recommendations from the Preferred Reporting  
144 Items for Systematic reviews and Meta-Analysis group to structure our protocol (PRISMA-P) [22]. We  
145 report the review using the PRISMA checklist [23] and highlight features that we adopted to speed  
146 up the review process [17]. Text S1 includes methods and results that are not reported here in the  
147 main text.

148 To report our findings, we use the term item for an individual record, e.g. a case report, surveillance  
149 report, or original research article. Some items reported different aspects of information about the  
150 same individuals or population. To avoid double counting, we organised items that reported on the  
151 same patients into groups. We chose a primary publication (the item with the most complete  
152 information) to represent the group, to which other items were linked (S4a Table, S5a Table).

## 153 Eligibility

154 We included studies of any design and in any language that directly addressed any research question  
155 in the causality framework (S1 Text). We excluded reviews, commentaries, news items and journal  
156 correspondence that did not include original data but we checked their reference lists to identify  
157 other potentially relevant studies.

## 158 Information sources and search strategy

159 The search strategy was designed to find data about Zika virus and its consequences from ongoing  
160 studies and non-peer reviewed sources as well as published peer-reviewed studies to benefit from  
161 commitments to data-sharing in public health emergencies [24]. We searched: PubMed, Embase and  
162 LILACS electronic databases; PAHO Zika research portal, WHO and the European Centre for Disease  
163 Prevention and Control (ECDC) websites; journal websites; preprint servers and a real time updated  
164 portal of experimental animal studies [25] (see protocol [21] and S1 Text). For the dimension  
165 addressing analogous causes of the outcomes and for co-factors, we used items identified in the  
166 searches, their reference lists and non-systematic searches. We used Endnote X7 (Thomson Reuters,  
167 Philadelphia) for reference management.

168 We conducted our first search from the earliest date to April 11, 2016 and updated the search on  
169 May 30 and July 29. We selected items and extracted data systematically on included items up to  
170 May 30 and report on non-systematically identified studies up to July 29, 2016.

## 171 Study selection and data extraction

172 We used pre-piloted structured forms in the online database Research Electronic Data Capture  
173 (REDCap, Vanderbilt University, Nashville). To speed up study selection we screened titles, abstract  
174 and full texts by liberal accelerated screening [17] (S1 Text) and for data extraction, one reviewer  
175 extracted data and a second reviewer checked the extracted data. Discrepancies were resolved by  
176 discussion or by a third reviewer. We did not specify a single primary outcome because the number  
177 of causality dimensions and questions was too broad [17]. The data to be extracted differed  
178 according to the study design and the question(s) addressed (S1 Text, p8 and S2 Table). We used case  
179 definitions and laboratory diagnostic test interpretations as reported by study authors. Basic  
180 research studies were too diverse to allow consistent numerical data extraction so we summarised  
181 findings descriptively.

## 182 Synthesis of findings and assessment of methodological quality

183 We tabulated study level data and available data about clinical presentations from case reports, case  
184 series, cross-sectional studies, case-control studies and cohort studies. We assessed methodological  
185 quality for these designs using shortened checklists from the National Institute of Health and Clinical  
186 Excellence [26] and using reviewers' summaries of strengths and weaknesses of other study designs.  
187 Each reviewer recorded an overall judgement of each study to indicate whether the findings did or  
188 did not provide support for the causality dimension being assessed. Two reviewers reached  
189 consensus by discussion or adjudication by a third reviewer. We assigned a judgement of sufficient  
190 evidence about a causality dimension if the reviewers' assessments were supportive for at least half  
191 of the specific questions. We appraised the body of evidence according to the domains of the  
192 Grading of Research Assessment Development and Evaluation (GRADE) tool as suggested for urgent  
193 health questions [27], but did not apply upgrading or downgrading because these concepts could not  
194 be applied consistently across the range of study designs.

## 195 Expert panel

196 The WHO Zika Research Working Group convened an expert panel of 18 members with specialist  
197 knowledge in the fields of epidemiology and public health, virology, infectious diseases, obstetrics,  
198 neonatology and neurology (members of both groups listed at the end of the article). In a series of  
199 online web and telephone conferences between April 18 and May 23, 2016, we presented our  
200 approach to the assessment of causality in epidemiological studies, the questions in our causality  
201 framework, the methods and findings of the systematic review and our synthesis of evidence for  
202 each set of clinical outcomes. We discussed these topics with the experts during the conferences and  
203 followed up through email discussions between web conferences. After the conferences and email

204 consultation we drafted summary conclusions about the most likely explanation for the reported  
205 clusters of cases of microcephaly and Guillain-Barré syndrome. The expert panel members discussed  
206 these summaries to reach consensus statements that update the WHO position.

## 207 Results

208 Figure 1 shows the timeline of the systematic review process and expert panel deliberations.

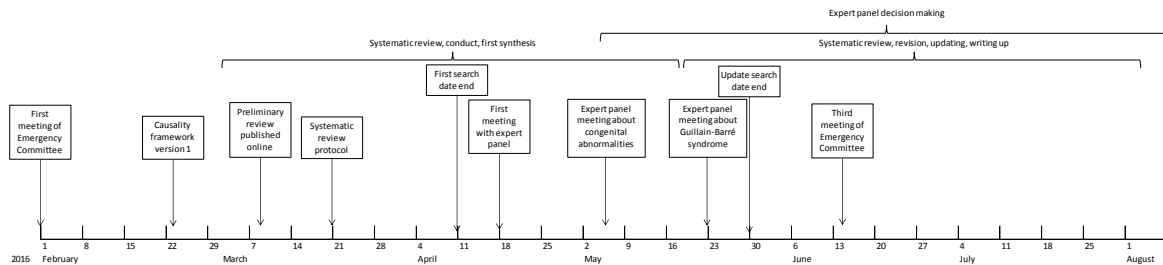

209

210 *Figure 1. Timeline of Zika causality review, 1st February to August 2016. A Public Health Emergency of International Concern*  
211 *was announced on 1<sup>st</sup> February 2016 in response to clusters of microcephaly, Guillain-Barré syndrome and other*  
212 *neurological disorders.*

213 We found 1091 unique items, published from 1952 to May 30, 2016 (S2 Figure, S3 Table). Most  
214 excluded items were reviews or editorials and commentaries (44%, n=479) or were articles about  
215 Zika virus that were not related to any of the causality dimensions (26%, n=282). We included 106  
216 items from 87 groups (Table 1), of which 83% were published in 2016.

217 Table 1 shows the study designs and causality dimensions addressed by the included studies up to  
218 May 30, 2016. For both outcomes, the majority of items were clinical individual level case reports,  
219 case series or population level surveillance data.

220

221



222 *Table 1. Summary of included items according to outcome, study design and causality dimension*

|                                        | Congenital abnormalities |            | Guillain-Barré syndrome |            |
|----------------------------------------|--------------------------|------------|-------------------------|------------|
|                                        | N                        | %          | N                       | %          |
| <b>Type of study</b>                   |                          |            |                         |            |
| Case report                            | 9                        | 12.5       | 9                       | 25         |
| Case series                            | 22                       | 30.6       | 5                       | 13.9       |
| Case-control study                     | 0                        | 0          | 1                       | 2.8        |
| Cohort study                           | 1                        | 1.4        | 0                       | 0          |
| Cross-sectional study                  | 2 <sup>a</sup>           | 2.8        | 0                       | 0          |
| Ecological study/outbreak report       | 5                        | 6.9        | 19                      | 52.8       |
| Modelling study                        | 2                        | 2.8        | 0                       | 0          |
| Animal experiment                      | 18                       | 25         | 0                       | 0          |
| In vitro experiment                    | 10                       | 13.9       | 0                       | 0          |
| Sequence analysis and phylogenetics    | 3                        | 4.2        | 2                       | 5.6        |
| <b>Total items</b>                     | <b>72</b>                | <b>100</b> | <b>36</b>               | <b>100</b> |
| <b>Causality dimension<sup>b</sup></b> |                          |            |                         |            |
| Temporality                            | 21                       | 36.2       | 26                      | 83.9       |
| Biological plausibility                | 25                       | 43.1       | 4                       | 12.9       |
| Strength of association                | 3                        | 5.2        | 2                       | 6.5        |
| Alternative explanation                | 18                       | 31         | 6                       | 19.4       |
| Cessation                              | 2                        | 3.4        | 6                       | 19.4       |
| Dose-response relationship             | 0                        | 0          | 0                       | 0          |
| Experiment                             | 20                       | 34.5       | 0                       | 0          |
| Analogy                                | NA                       | NA         | NA                      | NA         |
| Specificity                            | 0                        | 0          | 0                       | 0          |
| Consistency                            | NA                       | NA         | NA                      | NA         |
| <b>Total groups<sup>c</sup></b>        | <b>58</b>                |            | <b>31</b>               |            |

223 <sup>a</sup> One cross-sectional study studied human participants and one studied monkeys;

224 <sup>b</sup> A group of items could contribute to more than one causality dimension, so totals do not sum to 100%;

225 <sup>c</sup> Two items contribute to both topics.

226 Abbreviations: NA, not applicable; evidence about analogous conditions was not searched systematically; the dimension of  
227 consistency used information in items included for all other causality dimensions.

## 228 [Congenital brain abnormalities](#)

229 A total of 72 items belonging to 58 groups addressed questions related to congenital brain  
230 abnormalities up to May 30, 2016 [16, 25, 28-99]. Table 2 summarises the findings of the clinical  
231 characteristics of 278 mother-infant pairs described in case reports, case series without control

232 groups, one cross-sectional study and one cohort study. Table 3 summarises the assessment for each  
 233 causality dimension and S4a Table provides an extended description of study findings.

234 *Table 2. Geographic, clinical and microbiological characteristics of mother-infant pairs*

|                                                                          | No. with characteristic <sup>a</sup> | No. evaluated in the article <sup>a</sup> | % <sup>b</sup> |
|--------------------------------------------------------------------------|--------------------------------------|-------------------------------------------|----------------|
| <b>Total with congenital abnormalities or adverse pregnancy outcomes</b> | 278                                  | 278                                       | 100            |
| <b>Country of infection</b>                                              |                                      |                                           |                |
| Brazil                                                                   | 242                                  | 278                                       | 87.1           |
| Cabo Verde                                                               | 2                                    | 278                                       | 0.7            |
| Colombia                                                                 | 2                                    | 278                                       | 0.7            |
| French Polynesia                                                         | 19                                   | 278                                       | 6.8            |
| Martinique                                                               | 1                                    | 278                                       | 0.4            |
| Panama                                                                   | 4                                    | 278                                       | 1.4            |
| Travellers returning from the Americas                                   | 8                                    | 278                                       | 2.9            |
| <b>Pregnancy outcome</b>                                                 |                                      |                                           |                |
| Miscarriage                                                              | 7                                    | 278                                       | 2.5            |
| Intrauterine death or stillbirth                                         | 3                                    | 278                                       | 1.1            |
| Termination of pregnancy                                                 | 15                                   | 278                                       | 5.4            |
| Neonatal death                                                           | 9                                    | 278                                       | 3.2            |
| Alive, still in utero                                                    | 8                                    | 278                                       | 2.9            |
| Live birth                                                               | 236                                  | 278                                       | 84.9           |
| <b>Time point of presumed exposure (symptoms)</b>                        |                                      |                                           |                |
| 1 <sup>st</sup> trimester                                                | 81                                   | 117                                       | 69.2           |
| 2 <sup>nd</sup> trimester                                                | 28                                   | 117                                       | 23.9           |
| 3 <sup>rd</sup> trimester                                                | 8                                    | 117                                       | 6.8            |
| <b>Exposure assessment in the mother</b>                                 |                                      |                                           |                |
| Zika virus (ZIKV) related clinical symptoms                              | 180                                  | 265                                       | 67.9           |
| ZIKV positive in any test (serology/PCR/IHC)                             | 36                                   | 41                                        | 87.8           |
| ZIKV positive in any test before the outcome                             | 19                                   | 36                                        | 52.8           |
| ZIKV IgM positive (serum)                                                | 3                                    | 7                                         | 42.9           |
| ZIKV IgG positive (serum)                                                | 3                                    | 3                                         | 100.0          |
| ZIKV PRNT positive (serum)                                               | 4                                    | 4                                         | 100.0          |
| ZIKV RT-PCR positive (serum)                                             | 3                                    | 7                                         | 42.9           |
| ZIKV RT-PCR positive (urine)                                             | 1                                    | 5                                         | 20.0           |
| ZIKV RT-PCR positive (amniotic fluid)                                    | 9                                    | 12                                        | 75.0           |
| DENV IgG positive                                                        | 17                                   | 28                                        | 60.7           |
| <b>Exposure assessment in the foetus/newborn</b>                         |                                      |                                           |                |
| ZIKV positive in any test (serology/PCR/IHC)                             | 74                                   | 75                                        | 97.4           |
| ZIKV IgM positive (serum)                                                | 30                                   | 34                                        | 88.2           |
| ZIKV IgG positive (serum)                                                | 4                                    | 4                                         | 100.0          |
| ZIKV PRNT positive (serum)                                               | 2                                    | 2                                         | 100.0          |
| ZIKV RT-PCR positive (serum)                                             | 2                                    | 34                                        | 5.9            |
| ZIKV RT-PCR positive (brain tissue)                                      | 6                                    | 6                                         | 100.0          |
| ZIKV RT-PCR positive (other tissue)                                      | 6                                    | 11                                        | 54.5           |
| ZIKV RT-PCR positive (placenta/product of conception)                    | 7                                    | 8                                         | 87.5           |

|                                                    |     |     |       |
|----------------------------------------------------|-----|-----|-------|
| ZIKV RT-PCR positive (CSF)                         | 26  | 26  | 100.0 |
| ZIKV IHC positive (brain)                          | 4   | 5   | 80.0  |
| ZIKV IHC positive (other tissue)                   | 2   | 7   | 28.6  |
| ZIKV IHC positive (placenta/product of conception) | 3   | 4   | 75.0  |
| DENV IgG positive                                  | 1   | 34  | 2.9   |
| <b>Outcome assessment</b>                          |     |     |       |
| Clinical microcephaly                              | 244 | 267 | 91.4  |
| Imaging confirmed brain abnormalities              | 205 | 213 | 96.2  |
| Intrauterine growth restriction                    | 10  | 35  | 28.6  |
| Ocular disorders                                   | 49  | 116 | 42.2  |
| Auditory disorders                                 | 3   | 24  | 12.5  |
| Abnormal amniotic fluid                            | 6   | 33  | 18.2  |

235 <sup>a</sup> The denominator for each characteristic is the number of cases for which data were available;

236 <sup>b</sup> Column percentages shown for country of infection, pregnancy outcome and time point of exposure; row percentages for  
237 all other variables;

238 Abbreviations: CSF, cerebrospinal fluid; DENV dengue virus; IHC, immunohistochemistry; Ig, immunoglobulin; PRNT, plaque  
239 reduction neutralisation test; RT-PCR, reverse transcriptase PCR; ZIKV, Zika virus.

## 240 [Temporality](#)

241 Thirty-five items [37-44, 46-50, 52-54, 56, 58, 59, 64, 67, 72, 74, 75, 79-82, 84, 86, 91, 92, 94-96] in 21  
242 groups addressed three questions about this dimension (Table S4a). Overall, 67.9% (180/265) of  
243 women with clinical data available reported Zika virus symptoms during pregnancy (Table 2). The  
244 temporal sequence of confirmed Zika virus infection preceding a diagnosis of microcephaly was only  
245 available in a small proportion of pregnant women because many case reports were published  
246 before laboratory confirmation testing was available. Of the 36 mothers with laboratory confirmed  
247 Zika virus infection (serology and/or reverse transcriptase PCR, RT-PCR) 19 (52.8%) were confirmed  
248 before the detection of foetal malformations or the occurrence of miscarriage [47, 49, 52, 59, 74].  
249 The most recent studies show detailed timelines of laboratory confirmation of recent infection  
250 followed by in utero neuroimaging evidence of brain abnormalities and subsequent birth with  
251 microcephaly [49] or termination of pregnancy and confirmation of foetal infection [59]. The most  
252 likely time point of exposure was the first trimester or the early second trimester, based on individual  
253 case reports and three statistical modelling studies [54, 56, 67]. At the population level, epidemic  
254 curves of possible cases with Zika virus illness increased in parallel to reported cases of microcephaly  
255 with a time gap of 30 to 34 weeks in two states of Brazil (Pernambuco and Bahia) [64, 67] (S1 Text,  
256 p9, S3 Figure).

## 257 [Biological plausibility](#)

258 Twenty-eight items [36, 37, 41, 43-45, 47, 48, 51, 58, 59, 61-65, 68, 70, 71, 74, 76, 78, 81, 83, 85, 87,  
259 91, 97-99] in 25 groups addressed seven questions about this dimension of causality (S4a Table). The  
260 studies suggest several biologically plausible effects of Zika virus transmission in utero. Detailed

261 investigations from one report about a woman found Zika virus by RT-PCR in the serum of the  
262 woman with normal foetal ultrasound at 13 weeks [59]. Four weeks later, ultrasound showed a  
263 decrease in head circumference and other brain abnormalities and the pregnancy was terminated.  
264 The isolated viral particles from the brain were capable of replication in cell culture, but particles  
265 isolated from other tissues were not. Zika virus RNA was also found in foetal brain tissue in three  
266 other studies [41, 43, 45]. Basic research experiments have also found evidence that Zika virus from  
267 both the African and the Brazilian (Asian) lineages replicates in different types of neural progenitor  
268 cells [51, 76, 97]. The phosphatidylserine-sensing receptor tyrosine kinase AXL is a potential entry  
269 point into human cells; AXL has also been found to be expressed in developing human cerebral  
270 cortex tissue [36, 71]. *In vitro* studies using neural progenitor cells (NPCs) and cerebral organoids  
271 show that Zika virus replicates in neural tissue and can disturb the cell cycle and lead to apoptosis  
272 [51, 76, 83, 87, 97]. These findings suggest a teratogenic effect of Zika virus on the developing brain  
273 in which dysregulation of cell division and apoptosis during embryonal and/or foetal development  
274 contribute to the pathogenic effects.

#### 275 [Strength of association](#)

276 We reviewed seven items [49, 53, 54, 56, 67, 84, 92] in three groups up to May 30, 2016 for this  
277 dimension (S4a Table). Two published studies suggest that the association between Zika virus  
278 infection in pregnancy and congenital brain abnormalities is likely to be very strong [49, 54]. In Rio de  
279 Janeiro, investigators modified an ongoing study of women with rash in pregnancy [49]. They  
280 compared 72 women with positive RT-PCR results for Zika virus with 16 women with other causes of  
281 rash. Follow-up and assessment of the outcome seems to have been more intensive in women with  
282 Zika virus infection than those without. Of 42 Zika-infected women with one or more ultrasound  
283 scans, 12 (29%) had abnormal scans. All 16 women without Zika virus infection were reported to  
284 have had one normal routine scan, but no follow up data were reported. The authors did not  
285 calculate a risk ratio but the descriptive preliminary data suggest that Zika virus infection was  
286 associated with a marked increase in the risk of a wide range congenital abnormalities. In French  
287 Polynesia, investigators re-constructed a hypothetical cohort of pregnant women from different  
288 sources of data, including eight retrospectively identified cases of microcephaly. They estimated that  
289 the risk of microcephaly would be 53.4 times (95% confidence interval 6.5–1061.2) higher in women  
290 with Zika virus infection than in uninfected women if all infections had occurred in the first trimester.  
291 The statistical modelling and assumptions were clearly described, but the estimate was obtained  
292 from indirect data sources and the confidence intervals are very wide. We report here the result of a  
293 case-control study in Recife, Pernambuco, Brazil, which was ongoing at the time of the first searches.  
294 The Microcephaly Epidemiology Research Group enrolled 32 cases and 62 controls and found a crude

295 odds ratio 55.0, 95% CI 8.66–∞) between neonatal microcephaly and laboratory confirmed Zika virus  
296 infection in pregnancy [100].

297 At population level, analyses of data at the level of the state in Brazil showed a positive correlation  
298 between case reports of Zika-like illness per 100,000 population and cases of microcephaly per  
299 100,000 live births [56]. A separate analysis of these data showed a higher prevalence of  
300 microcephaly in 15 states that had reported Zika virus cases (2.8 per 10,000 live births) than in four  
301 states with no reported cases (0.6 per 10,000 live births) [53], corresponding to a prevalence ratio of  
302 4.7 (95% CI 1.9-13.3). The authors acknowledge potential under-reporting before surveillance was  
303 enhanced in 2015-2016, but the prevalence of microcephaly in the two worst affected states was still  
304 more than twice the level of a previous estimate from 1995-2008 of 5.1 per 10,000 births.

#### 305 [Exclusion of alternative explanations](#)

306 Twenty-eight items [37-46, 48-50, 52, 58, 59, 72, 75, 79-82, 85, 86, 91, 94-96] in 18 groups addressed  
307 three of six pre-specified categories of alternative explanations (S4a Table). From these assessments,  
308 no alternative single infectious cause could have resulted in large clusters of cases of microcephaly in  
309 different places. Sporadic cases with syphilis or HSV were found, but most mothers or infants were  
310 negative or seroconverted (negative IgM and positive IgG) for cytomegalovirus, rubella and  
311 toxoplasmosis. Acute dengue virus infection was also excluded in most studies. A small number of  
312 studies excluded maternal exposure to alcohol or medication, or genetic causes of congenital  
313 abnormalities [41, 42, 44, 58]. No study excluded exposure to environmental toxins or heavy metals.

#### 314 [Cessation](#)

315 We reviewed six items [53, 56, 64, 67, 84, 92] in two groups that addressed one of three questions  
316 about this dimension (S4a Table). Surveillance reports of cases of suspected Zika virus-like illness in  
317 northeastern Brazil in 2015 declined [64, 67] either due to seasonality of the vector or population  
318 immunity. Reports of microcephaly cases declined with a similar temporal pattern in Bahia state [67].  
319 In Pernambuco state, a similar decrease in Zika cases and microcephaly notifications was observed  
320 but a dengue epidemic occurred simultaneously with case numbers exceeding reports of Zika virus  
321 illness throughout 2015 so the decline in microcephaly cases might not be attributable to the Zika  
322 outbreak alone [64] (S1 Text, S3 Figure). There is no vaccine or treatment so it cannot be shown that  
323 a deliberate intervention would reverse the trend. We did not find any data on trends in  
324 microcephaly cases in countries other than Brazil.

#### 325 [Dose-response relationship](#)

326 We did not find any studies that addressed this dimension of causality.

## 327 Experiments in animals

328 We reviewed 20 items [25, 28-35, 55, 57, 60, 66, 69, 76, 77, 88-90, 93] that addressed four questions  
329 about animal experiments (S4a Table). Studies in the 1950s-1970s shows that experimental  
330 inoculation of Zika virus resulted in illness, cerebral lesions and viral replication in the brain in some  
331 but not all species tested [28-32, 34, 35]. Some of these effects might have been enhanced by the  
332 numerous serial passaging and subsequent viral adaptation of the original Ugandan Zika strain  
333 MR766 and the choice of genetically susceptible animal models. Wild monkeys with Zika virus,  
334 captured in Ethiopia, were also found to have degenerative brain lesions, but these lesions were not  
335 necessarily caused by the virus [33]. From 2000 onwards, animal studies have shown evidence of  
336 neurotropism in immunocompromised young and adult mice (A129, AG129, SCID, Ifnar) that lack are  
337 vulnerable to virus infections and in foetal or infant (suckling) immunocompetent mice (C57, BALB/c)  
338 [55, 77, 88], but not in adult immunocompetent mice (129 Sv/Ev, CD1, C57) [57, 60]. Real time  
339 reports are documenting studies of Macaque monkeys, experimentally infected with a Brazilian  
340 strain and a French Polynesian strain of Zika virus (both are Asian lineage) during pregnancy [25].  
341 High and persisting viraemia was observed in one animal. The infant did not have clinical  
342 microcephaly at delivery and brain tissue was negative for viral RNA, but some foetal tissues were  
343 positive. Inoculation of pregnant immunocompromised mice showed that Zika virus could cross the  
344 placenta and killed most embryos. The remaining foetuses showed significant growth restriction but  
345 not microcephaly [90].

## 346 Analogy

347 The link between clusters of babies born with microcephaly and an earlier outbreak of Zika virus  
348 infection in Brazil is analogous to an astute clinician's description in 1941 of a cluster of babies with  
349 congenital cataracts, microphthalmia and other abnormalities linked to an outbreak of rubella seven  
350 months before in Australia [101]. Some of the clinical features described in infants born to mothers  
351 who had Zika virus infection in pregnancy are similar to the consequences of other congenital  
352 infections, including rubella. Cytomegalovirus and toxoplasmosis can both cause microcephaly,  
353 intracranial calcification and ocular and auditory defects [102] (cited in [50]). Two cases of  
354 microcephaly were reported amongst 72 women infected with the neurotropic flavivirus West Nile  
355 virus infection in pregnancy [103]. A review of 30 studies of dengue virus infection in pregnancy  
356 found evidence of vertical transmission but did not mention microcephaly or other congenital brain  
357 abnormalities as possible complications [104].

### 358 Specificity of association

359 We did not find any studies that described neuroimaging or clinical features found only in association  
360 with Zika virus infection. A preliminary article described qualitative similarities and differences  
361 compared with other congenital infections [50] and several uncontrolled case series described the  
362 spectrum of neurological and other physical abnormalities *in utero* and at birth [39, 49, 58, 105].

### 363 Consistency

364 We assessed evidence of consistency by study design, geography, sub-population and virus lineage in  
365 all included items. Findings that support Zika virus infection as a cause of congenital brain  
366 abnormalities have come from different kinds of epidemiological studies and laboratory studies in  
367 both humans and animals (S4a Table). Case reports of pregnancies affected by Zika virus have come  
368 from different parts of the Americas, the Pacific region (Table 2) and West Africa [16, 73]. The  
369 prevalence of microcephaly has not been higher than expected in all countries with Zika virus  
370 transmission, however. Congenital brain abnormalities or Zika virus infection in products of  
371 conception, diagnosed in pregnant women returning from travel to a Zika-affected country [41, 47,  
372 59], show consistency across populations. There have been no reports of congenital brain  
373 abnormalities from countries affected by the African lineage [106]. One *in vitro* study found that  
374 Brazilian (Asian lineage) and African Zika strains both replicated in murine and human cell cultures  
375 and organoids [76, 83]. Rhesus macaques infected with the French Polynesian strain showed higher  
376 viraemia than macaques infected with the African lineage [66].

### 377 Summary of quality of evidence

378 The body of evidence includes a wide range of study designs and populations in both humans and  
379 animals (S4b Table). Much of the evidence in humans comes from uncontrolled or ecological study  
380 designs that have inherent biases for ascertaining causal associations. Amongst the few studies that  
381 examined the strength of association, effect sizes were either very large or (in an ongoing study)  
382 expected to be very large but also imprecise. One of three comparative studies was at low risk of  
383 bias. Evidence from animal studies is, by its nature, indirect. We could not formally assess publication  
384 bias; our search strategy was wide but we found very few studies with findings that were not  
385 consistent with causality. Evidence about analogous situations was not reviewed systematically.

386



387 *Table 3. Summary of reviewers' assessments of evidence about Zika virus infection and congenital abnormalities, by*  
 388 *causality dimension*

| <b>Causality dimension<sup>a</sup></b>       | <b>Evidence summary</b>                                                                                                                                                                                                                                                                                                                                                                                                                                                                                                                                                                                                                                                                                                                                                                                                                                                                                                                      |
|----------------------------------------------|----------------------------------------------------------------------------------------------------------------------------------------------------------------------------------------------------------------------------------------------------------------------------------------------------------------------------------------------------------------------------------------------------------------------------------------------------------------------------------------------------------------------------------------------------------------------------------------------------------------------------------------------------------------------------------------------------------------------------------------------------------------------------------------------------------------------------------------------------------------------------------------------------------------------------------------------|
| <b>Temporality</b>                           | Total, 35 items in 21 groups reviewed. Reviewer assessments found sufficient evidence for all 3 questions of an appropriate temporal relationship between Zika virus (ZIKV) infection and the occurrence of congenital abnormalities, including microcephaly. The period of exposure to ZIKV was most likely to be in the first or early second trimester of pregnancy.                                                                                                                                                                                                                                                                                                                                                                                                                                                                                                                                                                      |
| <b>Biological plausibility</b>               | Total, 28 items in 25 groups reviewed. Reviewer assessments found sufficient evidence for 6 of 7 questions that address biologically plausible mechanisms by which ZIKV could cause congenital abnormalities.                                                                                                                                                                                                                                                                                                                                                                                                                                                                                                                                                                                                                                                                                                                                |
| <b>Strength of association</b>               | Total, 7 items in 3 groups reviewed. Reviewer assessments found sufficient evidence of a strong association between ZIKV infection and congenital abnormalities for 2 of 2 questions. At the population level, there is strong evidence of an association. At the individual level, the effect size was extremely high, although imprecise, in 1 study and is likely to be high in the other study when follow-up is complete. A newly published case-control study from Brazil shows an effect size similar to that of the retrospective study from French Polynesia.                                                                                                                                                                                                                                                                                                                                                                       |
| <b>Exclusion of alternative explanations</b> | Total, 28 items of 18 groups reviewed. Reviewer assessments found sufficient evidence at the individual level that alternative explanations have been excluded for 3 of 7 questions; no other single explanation could have accounted for clusters of congenital abnormalities. The evidence about other exposures could not be assessed because of an absence of relevant studies.                                                                                                                                                                                                                                                                                                                                                                                                                                                                                                                                                          |
| <b>Cessation</b>                             | Total, 6 items in 2 groups reviewed. Reviewer assessments found sufficient evidence for 1 of 3 questions. In two states of Brazil and in French Polynesia cases of congenital abnormalities decreased after ZIKV transmission ceased. Evidence for the other questions could not be assessed because no relevant studies were identified.                                                                                                                                                                                                                                                                                                                                                                                                                                                                                                                                                                                                    |
| <b>Dose-response relationship</b>            | This dimension could not be assessed because of an absence of relevant studies.                                                                                                                                                                                                                                                                                                                                                                                                                                                                                                                                                                                                                                                                                                                                                                                                                                                              |
| <b>Animal experiments</b>                    | Total, 20 items reviewed. Reviewers assessments found evidence from animal experimental studies for all 4 questions that supports a causal link between ZIKV and congenital abnormalities. Inoculation with ZIKV of pregnant rhesus macaques and mice can result in foetal abnormalities, viraemia and brain abnormalities. Experiments to induce viral replication after inoculation of ZIKV intracerebrally and at other sites in a variety of animal models have produced mixed results.                                                                                                                                                                                                                                                                                                                                                                                                                                                  |
| <b>Analogy</b>                               | Selected studies reviewed. There are analogies with the well-described group of TORCH infections. Microcephaly has been described following the flavivirus West Nile virus (WNV) infection in pregnancy but not DENV. Evidence was not reviewed systematically.                                                                                                                                                                                                                                                                                                                                                                                                                                                                                                                                                                                                                                                                              |
| <b>Specificity</b>                           | No items reviewed. We did not find any studies that identified congenital abnormalities that were found following Zika virus infection in pregnancy but not in other congenital infections. The studies included described a wide range of abnormalities on clinical and neuroimaging examinations. Many of the abnormalities described are also found in other congenital infections, but with a different pattern.                                                                                                                                                                                                                                                                                                                                                                                                                                                                                                                         |
| <b>Consistency</b>                           | For 3 of 4 questions, the evidence assessed was consistent. By geographical region, maternal exposure to ZIKV has been associated with the occurrence of congenital abnormalities in all three regions where ZIKV has circulated since 2007. By study design, the association between ZIKV infection and congenital abnormalities has been found in studies at both individual and population level and with both retrospective and prospective designs. By population group, ZIKV infection has been linked to congenital abnormalities in both women resident in affected countries and in women from non-affected countries whose only possible exposure to ZIKV was having travelled in early pregnancy to an affected country. The evidence according to ZIKV lineage is inconsistent because an association between ZIKV and congenital abnormalities has only been reported from countries with ZIKV of the Asian lineage since 2013. |

389 <sup>a</sup> Questions for each causality dimension are in S1 Text, S2 Table.

390 Abbreviations: DENV, dengue virus; TORCH, Toxoplasmosis, Rubella, Cytomegalovirus, Herpes simplex virus; WNV, West  
 391 Nile virus; ZIKV, Zika virus.



## 392 Guillain-Barré syndrome

393 We found 35 items belonging to 31 groups that addressed questions related to Guillain-Barré  
394 syndrome [61-64, 74, 84, 107-129]. We summarise the findings according to clinical characteristics of  
395 117 individuals diagnosed with Guillain-Barré syndrome in case reports, case series without control  
396 groups and case-control studies in Table 4. Table 5 summarises the reviewers' assessments by  
397 causality dimension and S5a Table provides an extended description of study findings.

## 398 Temporality

399 We included 31 items [62-64, 74, 84, 107-119, 122-124, 127-129] in 26 groups that addressed three  
400 questions about this dimension (S5a Table). A temporal association at the individual level has been  
401 shown, with symptoms of Zika virus infection reported before the onset of Guillain-Barré syndrome  
402 symptoms in cases in French Polynesia, Brazil, El Salvador, Panama, Puerto Rico and Venezuela, and  
403 in returning travellers from Haiti, Suriname and Central America. All patients with Guillain-Barré  
404 syndrome had laboratory confirmed Zika virus infection except for 42 of 43 in Brazil and all those in El  
405 Salvador. The intervals between Zika virus and neurological symptoms delays of three to 12 days  
406 [115, 118, 119] are consistent with a post-infectious autoimmune mechanism [5]. In one ecological  
407 study in Bahia, Brazil, the lag between the epidemic peaks of cases with acute exanthematous illness  
408 and Guillain-Barré syndrome was five to nine weeks; the authors concluded that the actual delay  
409 might be shorter because the surveillance data recorded the date of hospitalisation rather than the  
410 onset of symptoms [84].

411 At the population level, 11 countries in Latin America (Brazil, Colombia, El Salvador, French Guiana,  
412 Honduras, Venezuela, Suriname) and the Caribbean (Dominican Republic, Jamaica, Martinique) and  
413 French Polynesia have reported an increase in Guillain-Barré syndrome cases during outbreaks of  
414 Zika virus infection. Surveillance reports show sporadic Guillain-Barré syndrome cases in association  
415 with Zika in four countries but without an increase above background level (Guadeloupe, Haiti,  
416 Panama, Puerto Rico). One study reported on surveillance data about acute flaccid paralysis in  
417 children, which is conducted routinely as part of the surveillance system for polio, in 20 island states  
418 in the South Pacific. The numbers of expected cases of acute flaccid paralysis was <1 per year in most  
419 countries because populations are small and an increase during periods of Zika virus transmission  
420 was only observed in the Solomon Islands [122].

421

422 Table 4. Geographic, clinical and microbiological characteristics of people with Guillain-Barré syndrome

|                                                                         | No. with characteristic                                                                                                        | No. evaluated | %     |
|-------------------------------------------------------------------------|--------------------------------------------------------------------------------------------------------------------------------|---------------|-------|
| <b>Total N of cases with Guillain-Barré syndrome</b>                    | 117                                                                                                                            | 117           | 100   |
| <b>Country of infection</b>                                             |                                                                                                                                |               |       |
| Brazil <sup>a</sup>                                                     | 43                                                                                                                             | 117           | 36.8  |
| El Salvador <sup>a</sup>                                                | 22                                                                                                                             | 117           | 18.8  |
| French Polynesia                                                        | 42                                                                                                                             | 117           | 35.9  |
| Haiti                                                                   | 1                                                                                                                              | 117           | 0.9   |
| Martinique                                                              | 2                                                                                                                              | 117           | 1.7   |
| Panama                                                                  | 2                                                                                                                              | 117           | 1.7   |
| Puerto Rico                                                             | 1                                                                                                                              | 117           | 0.9   |
| Travellers returning from the Americas                                  | 3                                                                                                                              | 117           | 2.6   |
| Venezuela                                                               | 1                                                                                                                              | 117           | 0.9   |
| <b>Exposure assessment</b>                                              |                                                                                                                                |               |       |
| Zika virus (ZIKV) symptomatic cases                                     | 83                                                                                                                             | 112           | 74.1  |
| ZIKV positive in any test (serology/RT-PCR)                             | 53                                                                                                                             | 53            | 100.0 |
| ZIKV IgM positive (serum)                                               | 41                                                                                                                             | 44            | 93.2  |
| ZIKV IgG positive (serum)                                               | 29                                                                                                                             | 42            | 69.0  |
| ZIKV PRNT positive (serum)                                              | 43                                                                                                                             | 43            | 100.0 |
| ZIKV RT-PCR positive (serum)                                            | 3                                                                                                                              | 49            | 6.1   |
| ZIKV RT-PCR positive (urine)                                            | 5                                                                                                                              | 6             | 83.3  |
| ZIKV RT-PCR positive (saliva)                                           | 0                                                                                                                              | 0             |       |
| ZIKV RT-PCR positive (CSF)                                              | 1                                                                                                                              | 3             | 33.3  |
| ZIKV culture positive (serum)                                           | 0                                                                                                                              | 0             |       |
| ZIKV culture positive (CSF)                                             | 0                                                                                                                              | 0             |       |
| DENV IgG positive                                                       | 43                                                                                                                             | 45            | 95.6  |
| <b>Interval between ZIKV and Guillain-Barré syndrome symptoms, days</b> | Median 10, range 3-12 [113, 115, 117, 118, 124, 127]<br>French Polynesia: Median 6 (IQR 4-10) [119]<br>El Salvador: 7-15 [115] |               |       |

423 <sup>a</sup> Only one patient with Guillain-Barré syndrome in Brazil and none in El Salvador had laboratory confirmation of Zika virus infection;

424 Abbreviations: CSF, cerebrospinal fluid; DENV dengue virus; IQR, interquartile range; Ig, immunoglobulin; PRNT, plaque reduction  
425 neutralisation test; RT-PCR, reverse transcriptase PCR; ZIKV, Zika virus.

## 426 Biological plausibility

427 We reviewed six items [61, 109, 118, 119, 121, 123] in four groups that addressed two of three  
428 questions about biologically plausible mechanisms by which Zika virus could act as a trigger of  
429 Guillain-Barré syndrome (S5a Table). Anti-ganglioside antibodies, whose presence supports the  
430 clinical diagnosis of Guillain-Barré syndrome, were found in the serum of a third of patients in a case-  
431 control study in French Polynesia [119] and in one patient from Venezuela [118]. The case-control  
432 study and two *in silico* studies also provide some evidence for molecular mimicry of Zika virus  
433 epitopes and host antigens [119]. The *in silico* comparison of predicted epitopes and human antigens  
434 suggested peptide sharing between Zika virus and human proteins related to myelin/neuropathy  
435 [121] and von Willebrand Factor [61]. A direct effect of Zika virus on anterior horn cells or neurons

436 might also be plausible. Several experimental studies with human neural stem cells and various  
437 mouse models have shown some evidence for neurotropism of Zika virus (see S4a Table).

#### 438 [Strength of association](#)

439 We reviewed seven items [108-111, 119, 123, 129] in two groups identified up to May 30, 2016. We  
440 found one published case-control study, which enrolled 42 cases of Guillain-Barré syndrome during  
441 the Zika outbreak in French Polynesia and compared them with two control groups, 98 patients  
442 hospitalised at the same time with non-febrile illness and 70 patients with acute Zika virus illness but  
443 no neurological symptoms [119] (S5a Table). Several alternative causes of Guillain-Barré syndrome  
444 were excluded. Evidence of Zika virus infection was much more common in Guillain-Barré syndrome  
445 cases than controls (odds ratios 59.7, 95% CI 10.4– $\infty$  defined as IgM or IgG positivity and 34.1, 95%  
446 CI 5.8– $\infty$  defined as presence of neutralising antibodies). Cases and controls were matched but  
447 there was no additional adjustment for confounding. Using the same cases and population  
448 denominators, the incidence of Guillain-Barré syndrome in French Polynesia was estimated to be 21  
449 time higher during the Zika epidemic than in the pre-Zika period of 2009 to 2012, an attributable risk  
450 of 0.39 per 1000 py [129]. In Brazil, surveillance data showed a 19% increase in reports of Guillain-  
451 Barré syndrome cases in 2015 compared with 2014 in the country as a whole [108]. Information  
452 received after May 30 found a second case-control investigation conducted in Brazil that enrolled  
453 controls from the community and is ongoing; preliminary results suggest a similar, strong effect.

#### 454 [Alternative explanations](#)

455 We included ten items [109, 117, 119, 120, 123-128] in seven groups that addressed one of four  
456 categories of alternative explanations (S5a Table). In several studies, other infections that can trigger  
457 Guillain-Barré syndrome were excluded, such as *C. jejuni*, *Mycoplasma pneumoniae*, HIV, Epstein-  
458 Barr virus and herpes simplex virus. In the included studies, no single infectious trigger that would  
459 have resulted in Guillain-Barré syndrome outbreaks in multiple geographical locations was identified.

#### 460 [Cessation](#)

461 Eight items [63, 64, 84, 110, 111, 116, 129] in six groups addressed one of three questions about the  
462 effects of the removal of the suspected exposure (S5a Table). In surveillance reports from six  
463 countries (Brazil, Colombia, El Salvador, French Polynesia, Honduras and Suriname) the incidence of  
464 Guillain-Barré syndrome declined as reports of Zika virus infection fell. There is no vaccine or  
465 treatment so it cannot be shown that a deliberate intervention would reverse the trend.

#### 466 [Dose-response relationship, experiments in animals and specificity](#)

467 We did not find any studies that addressed these dimensions of causality.

## 468 Analogy

469 Guillain-Barré syndrome is a para or post-infectious neurological condition that can be triggered by a  
470 range of viral and bacterial infections [5]. Clusters of cases of Guillain-Barré syndrome have been  
471 reported in association with outbreaks of *C. jejuni* gastroenteritis [130]. The incidence of Guillain-  
472 Barré syndrome estimated from studies of the outbreak in French Polynesia of 0.24 per 1000 Zika  
473 virus infections [119], is at the lower end of estimates from studies of *C. jejuni* (0.3 per 1000 [131]  
474 and 1.17 per 1000 [132]). The reported latency between gastrointestinal symptoms and onset of  
475 paralysis of approximately 9 days (range 1-23 days) [131, 133, 134] is similar to Zika virus-associated  
476 cases. Other, mosquito-borne neurotropic flaviviruses have been reported as possible triggers of  
477 Guillain-Barré syndrome in case reports and case series; dengue virus [135], West Nile virus [136],  
478 Japanese B encephalitis virus [137, 138] or yellow fever 17D vaccination [139]. An acute  
479 poliomyelitis-like flaccid paralysis, resulting from direct neural infection presumably of anterior horn  
480 cells, has also been reported as a clinical consequence of these viruses [136, 140, 141]. Putative  
481 biological mechanisms include upregulation of MHC class I and II molecules of peripheral nerve cells  
482 and subsequent immune-mediated cell destruction [142], auto-antibodies directed against heat  
483 shock proteins [143], galactocerebrosides [144] or myelin basic protein (MBP), and proliferation of  
484 MBP specific T-cells [145].

## 485 Consistency

486 We assessed evidence of consistency by study design, geography, sub-population and virus lineage in  
487 all included items (S5a Table). The link between Zika virus and Guillain-Barré syndrome has been  
488 made in studies of different designs at individual and population level. Clusters of Guillain-Barré  
489 syndrome have been seen in multiple countries during epidemics of Zika virus but have not been  
490 reported in all those in which Zika virus outbreaks have occurred. Outbreaks of Guillain-Barré  
491 syndrome in which gene sequencing has been done were associated with Zika virus of the Asian  
492 lineage.

## 493 Summary of quality of evidence

494 The body of evidence includes a wide range of study designs and populations in humans (S5b Table).  
495 A majority of the evidence reviewed was from uncontrolled or ecological study designs that have  
496 inherent biases for ascertaining causal associations. The only study that examined the strength of  
497 association found a very large but imprecise estimate of the effect size. This study did not have  
498 serious risks of bias. There was no evidence of indirectness. We could not formally assess publication  
499 bias but we had a broad search strategy and we did find evidence that outbreaks of Guillain-Barré  
500 syndrome have not been seen in all countries with Zika virus transmission.

501 Table 5. Summary of reviewers' assessments of evidence about Zika virus infection and Guillain-Barré syndrome, by causality  
502 dimension

| Causality dimension <sup>a</sup>                | Evidence summary                                                                                                                                                                                                                                                                                                                                                                                                                                                                                                                                                                                                                                                                                                                                                        |
|-------------------------------------------------|-------------------------------------------------------------------------------------------------------------------------------------------------------------------------------------------------------------------------------------------------------------------------------------------------------------------------------------------------------------------------------------------------------------------------------------------------------------------------------------------------------------------------------------------------------------------------------------------------------------------------------------------------------------------------------------------------------------------------------------------------------------------------|
| 1. <b>Temporality</b>                           | Total, 31 studies in 26 groups. Reviewer assessments found sufficient evidence for all 3 questions of an appropriate temporal relationship between ZIKV infection and GBS. The time interval between ZIKV symptoms and onset of neurological symptoms was compatible with that of other accepted triggers of GBS.                                                                                                                                                                                                                                                                                                                                                                                                                                                       |
| 2. <b>Biological plausibility</b>               | Total, 6 items in 4 groups reviewed. Reviewer assessments found sufficient evidence for 2 of 3 questions about biologically plausible mechanisms by which ZIKV could trigger the immune-mediated pathology of GBS. There is evidence that supports a role for molecular mimicry, a proposed mechanism of autoimmunity, which has been reported in <i>Campylobacter jejuni</i> -associated GBS. Direct neurotropic effects of ZIKV might also occur.                                                                                                                                                                                                                                                                                                                     |
| 3. <b>Strength of association</b>               | Total 7 items in 2 groups reviewed. The reviewers assessed evidence from the ZIKV outbreak in French Polynesia as showing a strong association between ZIKV and GBS at both the individual and population level. Surveillance reports from Brazil also support an association at the population level. Preliminary results from a case-control study in Brazil suggest a similar, strong effect.                                                                                                                                                                                                                                                                                                                                                                        |
| 4. <b>Exclusion of alternative explanations</b> | Total, 10 items in 7 groups studies reviewed. Reviewer assessments found sufficient evidence at the individual level that other infectious triggers of GBS have been excluded; no other single infection could have accounted for clusters of GBS. The evidence about other exposures could not be assessed because of an absence of relevant studies.                                                                                                                                                                                                                                                                                                                                                                                                                  |
| 5. <b>Cessation</b>                             | Total 8 items in 6 groups reviewed. Reviewer assessments found sufficient evidence for 1 of 3 questions. In one state in Brazil, four other countries in the Americas and in French Polynesia, reports of GBS decreased after ZIKV transmission ceased. Evidence for the other questions could not be assessed because no relevant studies were identified.                                                                                                                                                                                                                                                                                                                                                                                                             |
| 6. <b>Dose-response relationship</b>            | No relevant studies identified.                                                                                                                                                                                                                                                                                                                                                                                                                                                                                                                                                                                                                                                                                                                                         |
| 7. <b>Animal experiments</b>                    | No relevant studies of animal models of immune-mediated neuropathology identified. Evidence about neurotropism of ZIKV summarised in S4a Table.                                                                                                                                                                                                                                                                                                                                                                                                                                                                                                                                                                                                                         |
| 8. <b>Analogy</b>                               | Evidence was not reviewed systematically; Selected studies reviewed for 2 of 3 questions. Analogous mosquito-borne neurotropic flavivirus infections have been reported in association with GBS (WNV; DENV; JEV). WNV and JEV have also been reported to be associated with direct neurotropic effects and poliomyelitis-like acute flaccid paralysis. The time lag between ZIKV symptoms and GBS symptoms is analogous to intervals reported for other infectious triggers of GBS. There is some evidence that, as for <i>C. jejuni</i> -associated GBS, molecular mimicry could be involved.                                                                                                                                                                          |
| 9. <b>Specificity</b>                           | No relevant studies identified.                                                                                                                                                                                                                                                                                                                                                                                                                                                                                                                                                                                                                                                                                                                                         |
| 10. <b>Consistency</b>                          | For 3 of 4 questions, there was sufficient evidence of consistency. By geographical region, ZIKV transmission has been associated with the occurrence of GBS in 2 of 3 regions where ZIKV has circulated since 2007. By study design, the association between ZIKV infection and GBS has been found in studies at both individual and population level. By population group, ZIKV infection has been linked to GBS in both residents of an affected country and travellers from non-affected countries whose only possible exposure to ZIKV was having travelled to an affected country. The evidence according to ZIKV lineage is unclear because an association between ZIKV and GBS has only been reported from countries with ZIKV of the Asian lineage since 2013. |

503 <sup>a</sup> Questions for each causality dimension are in S1 Text, S2 Table.

504 Abbreviations: DENV, dengue virus; GBS, Guillain-Barré syndrome; JEV, Japanese encephalitis virus; WNV, West Nile virus;  
505 ZIKV, Zika virus.

506

## 507 Co-factors that might act in the presence of Zika virus

508 We prespecified seven categories of co-factors (S1 Text, S2 Table). The most widely discussed in the  
509 studies that we reviewed was past dengue virus infection [119]. It is hypothesised that a mechanism  
510 known as antibody-dependent enhancement might be involved, when IgG antibodies against viral  
511 envelope proteins resulting from a prior infection bind to virus particles of a subsequent infection  
512 leading to enhanced replication and potentially more severe illness [146]. Evidence from *in vitro*  
513 experiments suggests cross-reactivity between dengue and Zika virus antibody responses and  
514 antibody dependent enhancement of Zika virus by dengue antibodies [146, 147]. In several of the  
515 studies that we reviewed, evidence of past dengue virus infection was reported (S1 Text, p10-11).  
516 We did not systematically review evidence for other co-factors but report additional narrative  
517 findings in S1 Text.

## 518 WHO expert panel conclusions about causality

- 519 ▪ The most likely explanation of available evidence from outbreaks of Zika virus infection and  
520 clusters of microcephaly is that Zika virus infection during pregnancy is a cause of congenital  
521 brain abnormalities including microcephaly;
- 522 ▪ The most likely explanation of available evidence from outbreaks of Zika virus infection and  
523 Guillain-Barré syndrome is that Zika virus infection is a trigger of Guillain-Barré syndrome.

524 The expert panel recognises that Zika virus alone may not be sufficient to cause either congenital  
525 brain abnormalities or Guillain-Barré syndrome. The expert panel recognises that Zika virus alone  
526 may not be sufficient to cause either congenital brain abnormalities or Guillain-Barré syndrome. We  
527 do not know whether these effects depend on as yet uncharacterised co-factors being present; nor  
528 do we know whether dengue virus plays a part, as this is carried by the same species of mosquito  
529 and has circulated in many countries during the same period.

530 The panel agreed that there is sufficient evidence to recommend:

- 531 ▪ increasing public health actions to reduce the risk of the effects of Zika virus infection in  
532 pregnancy, and to provide appropriate care and support for women who have been exposed  
533 [148];
- 534 ▪ increasing public health actions to reduce exposure to Zika virus for all people;
- 535 ▪ increasing public health actions to provide appropriate clinical care and rehabilitation and  
536 continuing care for all those with long term neurological conditions, such as acute clinical  
537 services and rehabilitation;
- 538 ▪ increasing surveillance and research into diagnostics, vaccines, treatments and vector control.

## 539 Discussion

540 We conducted a rapid systematic review of 109 items from 87 groups up to May 30, 2016 about  
541 causal links between Zika virus infection and congenital brain abnormalities or Guillain-Barré  
542 syndrome. We found at least one study that supported a causal association between Zika virus  
543 infection and congenital brain abnormalities, including microcephaly, addressing one or more specific  
544 questions for eight of 10 causality dimensions (all except dose-response relationship and specificity)  
545 and Guillain-Barré syndrome in seven of ten dimensions (all except dose-response relationship,  
546 specificity and animal experimental evidence). There are methodological weaknesses, inconsistencies  
547 and gaps in the body of evidence for both sets of conditions. Studies found after the cut-off for our  
548 first searches did not change our conclusions, but strengthened the evidence about biological  
549 plausibility, strength of association and exclusion of alternative explanations.

### 550 Interpretation of the review findings

551 The expert panel's conclusions support causal links between Zika virus infection and congenital brain  
552 abnormalities and Guillain-Barré syndrome and address Bradford Hill's pragmatic question, "is there  
553 any other way of explaining the set of facts before us, is there any other answer equally, or more,  
554 likely than cause and effect?" [10]. The conclusions are based on the body of evidence, which  
555 includes both the epidemiological context of unexpected clusters of different types of neurological  
556 conditions in countries that have experienced their first outbreaks of Zika virus infection and the  
557 strengths and weaknesses of a systematic review structured around 10 dimensions of causality (S4a  
558 Table, S4b Table, S5a Table and S5b Table). Empirical observations cannot "prove" causality, however  
559 [10, 149], and discussions about Zika virus and the terminology for describing its effects have been  
560 intense [12]. We use the term "a cause" rather than "the cause" because most causes of disease are  
561 just one component of a set of factors that all have to be present in the right constellation to result in  
562 the effect [150]. A cause can be identified without understanding all the other components or the  
563 complete causal mechanisms involved [149, 150]. In the case of Guillain-Barré syndrome, the  
564 infections that precede it are often referred to as "triggers" of the immune-mediated causal  
565 pathways involved in pathogenesis.

566 The body of evidence about Zika virus and congenital abnormalities (72 items included in the  
567 systematic review) has grown more quickly than that for Guillain-Barré syndrome (36 items). Initially,  
568 reporting about Guillain-Barré syndrome was more detailed; our preliminary review found cases of  
569 Guillain-Barré syndrome in eight countries in the Americas and Pacific regions, whereas microcephaly  
570 had only been reported from Brazil [19] and the first comparative study was a case-control study of  
571 Guillain-Barré syndrome [119]. Research efforts might have concentrated on congenital brain



572 abnormalities since then because observations of clusters of infants with congenital abnormalities  
573 were so unusual, especially in Brazil where rubella has been eradicated. In contrast, Guillain-Barré  
574 syndrome is an established post-infectious neurological disorder and some commentators have  
575 already dubbed Zika virus “another viral cause” [15]. Our systematic approach to the assessment of  
576 causality was needed, however, because many infections have been temporally associated with  
577 Guillain-Barré symptoms [5]. Whilst the case-control study from French Polynesia is the only one  
578 published so far [119], clusters of Guillain-Barré syndrome during outbreaks of Zika virus infection  
579 have been reported from several other countries and case-control studies are ongoing in Brazil,  
580 Colombia, Mexico and Argentina.

581 Comparative studies based on data from the outbreak in French Polynesia suggest that the risk of  
582 both microcephaly or of Guillain-Barré syndrome is at least 30 times higher in people who had Zika  
583 virus infection compared to those who did not [54, 100, 119], although confidence intervals around  
584 these estimates are very wide. The true effect size might be weaker because the earliest studies  
585 investigating causality often overestimate the true effect, the so-called “random high” [151]. Even if  
586 the methods of other forthcoming studies in Brazil [49] and elsewhere reduce confounding and  
587 biases in selection of study populations and measurement of exposure and outcome, the increase in  
588 the risk of disease amongst those with Zika virus infection is likely to remain substantially raised.  
589 Inconsistencies in the evidence base still need investigation, however. Disease clusters have not been  
590 documented in several regions or countries affected by the most recent wave of Asian strain Zika  
591 virus infections and were not seen in Africa [152]. Some countries might not have observed these  
592 rare events because they are too small or surveillance systems are limited or use different case  
593 definitions. In the case of microcephaly, the time since the Zika outbreak might not be long enough  
594 to have resulted in births of affected babies if the period of highest risk is in the first trimester [153],  
595 or terminations of potentially affected pregnancies might have resulted in underascertainment [154].

596 Current evidence does not show which specific environmental and host factors interact with Zika  
597 virus to increase the risk of an affected pregnancy or of Guillain-Barré syndrome or whether there  
598 are specific factors that also have an effect in certain places. A co-factor that interacts with Zika virus  
599 to increase the risk of neurological damage could also help to explain why surveillance reports show  
600 clusters of microcephaly in some geographical areas but not others. Dengue virus has been  
601 suggested as a possible co-factor (or another component cause) [150] that might increase the risk of  
602 neurological outcomes. One major limitation to interpretation of data about causality and co-factors  
603 is the lack of accurate and accessible diagnostic tools, owing to the short duration of viraemia, cross-  
604 reactivity with other flaviviruses and lack of standardisation [155]. One report hypothesised that an  
605 insecticide used to treat drinking water (pyriproxyfen) could cause microcephaly due to possible



606 biochemical interactions with growth regulators and observed that microcephaly cases in Brazil were  
607 reported after the introduction of the insecticide [156], but did not provide any specific data about  
608 exposure in affected women and was therefore excluded from the review.

### 609 [Strengths and limitations](#)

610 The strengths of our study are that we appraised evidence of causality systematically but rapidly and  
611 transparently within a structured framework. Our searches used simple search strings and we  
612 searched sources of both published and unpublished articles without language restrictions so we  
613 believe that we identified all major relevant items about Zika virus infection. The systematic review  
614 process could not eliminate publication bias but reduced the risk that only positive reports in favour  
615 of causation would be evaluated. There were limitations to the process too, mostly resulting from  
616 the urgency of the situation. Our search strategy only included terms for Zika virus so did not cover  
617 the literature about analogous conditions or co-factors systematically. We did not have time for  
618 study selection and data extraction by two independent reviewers but additional reviewers checked  
619 the extracted data independently. Our rapid assessment of quality was not quantitative. We did not  
620 find a tool that covered our review questions and all the study designs appropriately. We followed  
621 suggestions for use of the Grading of Research Assessment Development and Evaluation tool in  
622 urgent public health situations [27] but could not standardise it for the wide range of study designs in  
623 our causality framework in the time available and we did not assign a level of certainty through  
624 formal up- or downgrading of the evidence.

### 625 [Implications for policy and research](#)

626 The conclusions of the expert panel facilitate the promotion of stronger public health measures and  
627 research to tackle Zika virus and its effects. The gaps in the causality framework that we identified  
628 provide researchers with research questions and WHO has published a Zika strategic response plan  
629 [157]. Better tests to diagnose both acute and past infection will allow more accurate ascertainment  
630 of the presence of Zika virus in tissues and assessment of population level immunity to improve  
631 understanding of the epidemiology of neurological disorders. Clinical and basic research are needed  
632 to define the mechanisms of causality and to distinguish between the roles of autoimmunity and  
633 direct neurotropic effects of Zika virus in the manifestations of acute flaccid paralysis. Basic research  
634 will also further the development of vaccines, treatments and better vector control methods, which  
635 will allow direct assessment of the effects on neurological disorders of preventing Zika virus  
636 infection. For the populations currently at risk, cohort studies are needed to determine both absolute  
637 and relative risks of pregnancies affected by asymptomatic and symptomatic Zika virus infection, the  
638 role of co-factors and effect modifiers, and to define the congenital Zika virus syndrome.

## 639 From rapid systematic review to living systematic review

640 Our systematic review within the structured causality framework deals with multiple neurological  
641 disorders and more detailed questions about causality than other reviews. We reached the same  
642 conclusion as Rasmussen et al. [14] but found a larger number of studies, which allowed a more  
643 comprehensive and balanced summary of evidence and of evidence gaps. In addition, our review  
644 addresses the association between Zika virus and Guillain-Barré syndrome, which is also an  
645 important source of morbidity. Systematic reviews have been done to respond to other urgent public  
646 health situations, including severe acute respiratory syndrome (SARS) [158] and avian influenza A  
647 (H5N1) [159]. These reviews focused on single conditions and only on the effects of drug treatment  
648 for which review tools are readily available.

649 Our review will quickly become outdated because the pace of new publications is outstripping the  
650 time taken for the review process, which includes data cleaning, analysis and interpretation. The  
651 concept of a “living systematic review” has been proposed as a way to combine rigour with  
652 timeliness for intervention research [160]. Elliott et al. propose the development of methods to  
653 produce high-quality evidence summaries that incorporate new evidence as soon as it is available  
654 and make them available immediately. The concept capitalises on technological advances to make  
655 searches and data extraction more efficient and to link the updated review text directly to open  
656 access publication with post-publication peer review [161]. The declaration by journal editors to  
657 improve access to data during public health emergencies [24, 162] could be combined with the living  
658 systematic review approach to improve the timeliness of communication about and accessibility of  
659 research about causality. We are working on methods to produce a living systematic review of the  
660 Zika causality framework that will incorporate cumulative meta-analyses of both aggregate and  
661 independent patient data as these become available.

662 In summary, rapid and systematic reviews with frequent updating and open dissemination are now  
663 needed, both for appraisal of the evidence about Zika virus infection and for the next public health  
664 threats that will emerge. This rapid systematic review found sufficient evidence to conclude that Zika  
665 virus is a cause of congenital abnormalities and is a trigger of Guillain-Barré situation.

666

## 667 Acknowledgements

668 Expert panel members: Nahida Chakhtoura, National Institutes of Health/National Institute of Child  
669 Health and Development, USA; Niklas Danielsson, European Centre for Disease Prevention and  
670 Control, Sweden; Paul Garner, Liverpool School of Tropical Medicine, UK; Eva Harris, Sustainable  
671 Sciences Institute, USA; Mauricio Hernandez Avila, Instituto Nacional de Salud Pública, Mexico;  
672 Margaret Honein, Centers for Disease Control and Prevention, USA; Bart Jacobs, Erasmus University,  
673 Netherlands; Thomas Jänisch, University of Heidelberg, Germany; Marcela María Mercado Reyes,  
674 Instituto Nacional de Salud, Colombia; Ashraf Nabhan, Ain Shams University, Egypt; Laura Rodrigues,  
675 London School of Hygiene and Tropical Medicine, UK; Holger Schünemann, McMaster University,  
676 Canada; James Sejvar, Centers for Disease Control and Prevention, USA ; Tom Solomon, University of  
677 Liverpool, UK; Jan Vandenbroucke, Leiden University Medical Centre, Netherlands; Vanessa Van der  
678 Linden, Hospital Barao de Lucena, Brazil; Maria van Kerkhove, Institut Pasteur, France ; Tatjana Avšič  
679 Županc, University of Ljubljana, Slovenia.

680 WHO Zika causality working group members: Nathalie Broutet, Maria Almiron, Tarun Dua,  
681 Christopher Dye, Pierre Formenty, Florence Fouque, Metin Gulmezoglu, Edna Kara, Anais Legand,  
682 Bernadette Murgue, Susan Norris, Olufemi Oladapo, William Perea Caro, Pilar Ramon Pardo, Ludovic  
683 Reveiz Herault, João Paulo Souza.

684 The views expressed in this article are those of the authors and do not necessarily represent the  
685 decisions, policies, or views of the WHO or PAHO.

686 Supported by funding from WHO.

## 687 References

- 688 1. Fauci AS, Morens DM. Zika Virus in the Americas--Yet Another Arbovirus Threat. *N Engl J*  
689 *Med.* 2016;374(7):601-4. Epub 2016/01/14. doi: 10.1056/NEJMp1600297. PubMed PMID: 26761185.
- 690 2. Pan American Health Organization, World Health Organization. Epidemiological Alert.  
691 Neurological syndrome, congenital malformations, and Zika virus infection. Implications for public  
692 health in the Americas - 1 December 2015. 2015. Available from:  
693 [http://www.paho.org/hq/index.php?option=com\\_docman&task=doc\\_view&Itemid=270&gid=32405](http://www.paho.org/hq/index.php?option=com_docman&task=doc_view&Itemid=270&gid=32405)  
694 [http://www.paho.org/hq/index.php?option=com\\_docman&task=doc\\_view&Itemid=270&gid=32405](http://www.paho.org/hq/index.php?option=com_docman&task=doc_view&Itemid=270&gid=32405)  
&lang=en. [Last accessed 17.08.2016].
- 695 3. Heymann DL, Hodgson A, Sall AA, Freedman DO, Staples JE, Althabe F, et al. Zika virus and  
696 microcephaly: why is this situation a PHEIC? *Lancet.* 2016;387(10020):719-21. Epub 2016/02/16. doi:  
697 10.1016/s0140-6736(16)00320-2. PubMed PMID: 26876373.
- 698 4. Woods CG, Parker A. Investigating microcephaly. *Arch Dis Child.* 2013;98(9):707-13. doi:  
699 10.1136/archdischild-2012-302882. PubMed PMID: 23814088.
- 700 5. Willison HJ, Jacobs BC, van Doorn PA. Guillain-Barre syndrome. *Lancet.* 2016. doi:  
701 10.1016/S0140-6736(16)00339-1. PubMed PMID: 26948435.
- 702 6. World Health Organization. Zika situation report. Zika virus, Microcephaly and Guillain-Barré  
703 syndrome - 4 August 2016. Geneva: World Health Organization, 2016. Available from:  
704 <http://www.who.int/emergencies/zika-virus/situation-report/4-august-2016/en/>. [Last accessed  
705 10.08.2016].
- 706 7. Carey JC, Martinez L, Balken E, Leen-Mitchell M, Robertson J. Determination of human  
707 teratogenicity by the astute clinician method: review of illustrative agents and a proposal of  
708 guidelines. *Birth Defects Res A Clin Mol Teratol.* 2009;85(1):63-8. doi: 10.1002/bdra.20533. PubMed  
709 PMID: 19107954.
- 710 8. Vandebroucke JP. Observational research, randomised trials, and two views of medical  
711 science. *PLoS Med.* 2008;5(3):e67. doi: 10.1371/journal.pmed.0050067. PubMed PMID: 18336067;  
712 PubMed Central PMCID: PMCPMC2265762.
- 713 9. Vandebroucke JP. In defense of case reports and case series. *Ann Intern Med.*  
714 2001;134(4):330-4. PubMed PMID: 11182844.
- 715 10. Hill AB. The Environment and Disease: Association or Causation? *Proc R Soc Med.*  
716 1965;58:295-300. PubMed PMID: 14283879; PubMed Central PMCID: PMCPMC1898525.
- 717 11. Gordis L. Chapter 14. From Association to Causation: Deriving Inferences from Epidemiologic  
718 Studies. *Epidemiology: Saunders Elsevier*; 2009. p. 227-46.
- 719 12. Doshi P. Convicting Zika. *BMJ.* 2016;353:i1847. Epub 2016/04/09. doi: 10.1136/bmj.i1847.  
720 PubMed PMID: 27056643.
- 721 13. Frank C, Faber M, Stark K. Causal or not: applying the Bradford Hill aspects of evidence to the  
722 association between Zika virus and microcephaly. *EMBO Mol Med.* 2016;8(4):305-7. Epub  
723 2016/03/16. doi: 10.15252/emmm.201506058. PubMed PMID: 26976611; PubMed Central PMCID:  
724 PMCPMC4818755.

- 725 14. Rasmussen SA, Jamieson DJ, Honein MA, Petersen LR. Zika Virus and Birth Defects--Reviewing  
726 the Evidence for Causality. *N Engl J Med.* 2016;374(20):1981-7. Epub 2016/04/14. doi:  
727 10.1056/NEJMSr1604338. PubMed PMID: 27074377.
- 728 15. Smith DW, Mackenzie J. Zika virus and Guillain-Barre syndrome: another viral cause to add to  
729 the list. *Lancet.* 2016;387(10027):1486-8. Epub 2016/03/08. doi: 10.1016/S0140-6736(16)00564-X.  
730 PubMed PMID: 26948432.
- 731 16. World Health Organization. Zika situation report. Zika virus, Microcephaly and Guillain-Barré  
732 syndrome - 31 March 2016. 2016. Available from: [http://www.who.int/emergencies/zika-  
733 virus/situation-report/31-march-2016/en/](http://www.who.int/emergencies/zika-virus/situation-report/31-march-2016/en/). [Last accessed 17.08.2016].
- 734 17. Khangura S, Konnyu K, Cushman R, Grimshaw J, Moher D. Evidence summaries: the evolution  
735 of a rapid review approach. *Syst Rev.* 2012;1:10. doi: 10.1186/2046-4053-1-10. PubMed PMID:  
736 22587960; PubMed Central PMCID: PMC3351736.
- 737 18. Egger M, Davey Smith G. Principles of and procedures for systematic reviews. In: Egger M,  
738 Davey Smith G, Altman DG, editors. *Systematic Reviews in Health Care: Meta-analysis in Context.* 2.  
739 London: BMJ Books; 2001. p. 23-42.
- 740 19. Broutet N, Krauer F, Riesen M, Khalakdina A, Almiron M, Aldighieri S, et al. Zika Virus as a  
741 Cause of Neurologic Disorders. *N Engl J Med.* 2016;374(16):1506-9. Epub 2016/03/10. doi:  
742 10.1056/NEJMp1602708. PubMed PMID: 26959308.
- 743 20. Solomon T. Flavivirus encephalitis and other neurological syndromes (Japanese encephalitis,  
744 WNV, Tick borne encephalitis, Dengue, Zika virus). *Int J Infect Dis.* 2016;45:24. doi:  
745 10.1016/j.ijid.2016.02.086. PubMed PMID: 272245053.
- 746 21. Low N, Krauer F, Riesen M. Causality framework for Zika virus and neurological disorders:  
747 systematic review protocol. PROSPERO. 2016:CRD42016036693.
- 748 22. Moher D, Shamseer L, Clarke M, Ghersi D, Liberati A, Petticrew M, et al. Preferred reporting  
749 items for systematic review and meta-analysis protocols (PRISMA-P) 2015 statement. *Syst Rev.*  
750 2015;4(1):1. doi: 10.1186/2046-4053-4-1. PubMed PMID: 25554246; PubMed Central PMCID:  
751 PMC3351736.
- 752 23. Moher D, Liberati A, Tetzlaff J, Altman DG, Group P. Preferred reporting items for systematic  
753 reviews and meta-analyses: the PRISMA statement. *PLoS Med.* 2009;6(7):e1000097. doi:  
754 10.1371/journal.pmed.1000097. PubMed PMID: 19621072; PubMed Central PMCID:  
755 PMC2707599.
- 756 24. Dye C, Bartolomeos K, Moorthy V, Kieny MP. Data sharing in public health emergencies: a call  
757 to researchers. *Bull World Health Organ.* 2016;94(3):158. doi: 10.2471/BLT.16.170860. PubMed  
758 PMID: 26966322; PubMed Central PMCID: PMC4773943.
- 759 25. Zika Experimental Science Team. ZIKV-003 and ZIKV-005: Infection with French Polynesian  
760 and Asian lineage Zika virus during the first pregnancy trimester 2016 [10.05.2016]. Available from:  
761 <https://zika.labkey.com/project/OConnor/ZIKV-003/begin.view?>
- 762 26. National Institute for Health and Clinical Excellence. Public Health Guidance. Methods  
763 manual, Version 1: December 2005. Available from: [www.nice.org.uk](http://www.nice.org.uk). London: National Institute for  
764 Clinical Excellence, 2005. Available from.

- 765 27. Thayer KA, Schunemann HJ. Using GRADE to respond to health questions with different levels  
766 of urgency. *Environ Int.* 2016;92-93:585-9. doi: 10.1016/j.envint.2016.03.027. PubMed PMID:  
767 27126781.
- 768 28. Dick GW, Kitchen SF, Haddow AJ. Zika virus. I. Isolations and serological specificity. *Trans R*  
769 *Soc Trop Med Hyg.* 1952;46(5):509-20. Epub 1952/09/01. PubMed PMID: 12995440.
- 770 29. Dick GW. Zika virus. II. Pathogenicity and physical properties. *Trans R Soc Trop Med Hyg.*  
771 1952;46(5):521-34. Epub 1952/09/01. PubMed PMID: 12995441.
- 772 30. Bearcroft WG. Zika virus infection experimentally induced in a human volunteer. *Trans R Soc*  
773 *Trop Med Hyg.* 1956;50(5):442-8. Epub 1956/09/01. PubMed PMID: 13380987.
- 774 31. Reagan RL, Stewart MT, Delaha EC, Brueckner AL. Response of the Syrian hamster to eleven  
775 tropical viruses by various routes of exposure. *Tex Rep Biol Med.* 1954;12(3):524-7. PubMed PMID:  
776 0007368163.
- 777 32. Weinbren MP, Williams MC. Zika virus: further isolations in the Zika area, and some studies  
778 on the strains isolated. *Trans R Soc Trop Med Hyg.* 1958;52(3):263-8. Epub 1958/05/01. PubMed  
779 PMID: 13556872.
- 780 33. Andral L, Bres, P., Serie, C. Yellow fever in Ethiopia. III. Serological and virological study of the  
781 forest fauna. [French]. *Bull.* 1968;Wld. Hlth. Org. 38(6):855-61. PubMed PMID: 0008222620.
- 782 34. Bell TM, Field EJ, Narang HK. Zika virus infection of the central nervous system of mice. *Arch*  
783 *Gesamte Virusforsch.* 1971;35(2):183-93. Epub 1971/01/01. PubMed PMID: 5002906.
- 784 35. Way JH, Bowen ET, Platt GS. Comparative studies of some African arboviruses in cell culture  
785 and in mice. *J Gen Virol.* 1976;30(1):123-30. Epub 1976/01/01. doi: 10.1099/0022-1317-30-1-123.  
786 PubMed PMID: 1245842.
- 787 36. Hamel R, Dejarnac O, Wichit S, Ekchariyawat P, Neyret A, Luplertlop N, et al. Biology of Zika  
788 Virus Infection in Human Skin Cells. *J Virol.* 2015;89(17):8880-96. Epub 2015/06/19. doi:  
789 10.1128/JVI.00354-15. PubMed PMID: 26085147; PubMed Central PMCID: PMC4524089.
- 790 37. Oliveira Melo AS, Malinge G, Ximenes R, Szejnfeld PO, Alves Sampaio S, Bispo de Filippis AM.  
791 Zika virus intrauterine infection causes fetal brain abnormality and microcephaly: tip of the iceberg?  
792 *Ultrasound Obstet Gynecol.* 2016;47(1):6-7. Epub 2016/01/06. doi: 10.1002/uog.15831. PubMed  
793 PMID: 26731034.
- 794 38. Ventura CV, Maia M, Bravo-Filho V, Gois AL, Belfort R, Jr. Zika virus in Brazil and macular  
795 atrophy in a child with microcephaly. *Lancet.* 2016;387(10015):228. Epub 2016/01/18. doi:  
796 10.1016/S0140-6736(16)00006-4. PubMed PMID: 26775125.
- 797 39. Schuler-Faccini L, Ribeiro EM, Feitosa IM, Horovitz DD, Cavalcanti DP, Pessoa A, et al. Possible  
798 Association Between Zika Virus Infection and Microcephaly - Brazil, 2015. *MMWR Morb Mortal Wkly*  
799 *Rep.* 2016;65(3):59-62. Epub 2016/01/29. doi: 10.15585/mmwr.mm6503e2. PubMed PMID:  
800 26820244.
- 801 40. Ventura CV, Maia M, Ventura BV, Linden VV, Araujo EB, Ramos RC, et al. Ophthalmological  
802 findings in infants with microcephaly and presumable intra-uterus Zika virus infection. *Arq Bras*  
803 *Oftalmol.* 2016;79(1):1-3. Epub 2016/02/04. doi: 10.5935/0004-2749.20160002. PubMed PMID:  
804 26840156.



- 805 41. Mlakar J, Korva M, Tul N, Popovic M, Poljsak-Prijatelj M, Mraz J, et al. Zika Virus Associated  
806 with Microcephaly. *N Engl J Med*. 2016;374(10):951-8. Epub 2016/02/11. doi:  
807 10.1056/NEJMoa1600651. PubMed PMID: 26862926.
- 808 42. de Paula Freitas B, de Oliveira Dias JR, Prazeres J, Sacramento GA, Ko AI, Maia M, et al. Ocular  
809 Findings in Infants With Microcephaly Associated With Presumed Zika Virus Congenital Infection in  
810 Salvador, Brazil. *JAMA Ophthalmol*. 2016. Epub 2016/02/13. doi:  
811 10.1001/jamaophthalmol.2016.0267. PubMed PMID: 26865554.
- 812 43. Martines RB, Bhatnagar J, Keating MK, Silva-Flannery L, Muehlenbachs A, Gary J, et al. Notes  
813 from the Field: Evidence of Zika Virus Infection in Brain and Placental Tissues from Two Congenitally  
814 Infected Newborns and Two Fetal Losses--Brazil, 2015. *MMWR Morb Mortal Wkly Rep*.  
815 2016;65(6):159-60. Epub 2016/02/20. doi: 10.15585/mmwr.mm6506e1. PubMed PMID: 26890059.
- 816 44. Calvet G, Aguiar RS, Melo AS, Sampaio SA, de Filippis I, Fabri A, et al. Detection and  
817 sequencing of Zika virus from amniotic fluid of fetuses with microcephaly in Brazil: a case study.  
818 *Lancet Infect Dis*. 2016;16(6):653-60. Epub 2016/02/22. doi: 10.1016/S1473-3099(16)00095-5.  
819 PubMed PMID: 26897108.
- 820 45. Sarno M, Sacramento GA, Khouri R, do Rosario MS, Costa F, Archanjo G, et al. Zika Virus  
821 Infection and Stillbirths: A Case of Hydrops Fetalis, Hydranencephaly and Fetal Demise. *PLoS Negl  
822 Trop Dis*. 2016;10(2):e0004517. Epub 2016/02/26. doi: 10.1371/journal.pntd.0004517. PubMed  
823 PMID: 26914330; PubMed Central PMCID: PMC4767410.
- 824 46. Werner H, Fazecas T, Guedes B, Lopes Dos Santos J, Daltro P, Tonni G, et al. Intrauterine Zika  
825 virus infection and microcephaly: correlation of perinatal imaging and three-dimensional virtual  
826 physical models. *Ultrasound Obstet Gynecol*. 2016;47(5):657-60. Epub 2016/03/01. doi:  
827 10.1002/uog.15901. PubMed PMID: 26923098.
- 828 47. Meaney-Delman D, Hills SL, Williams C, Galang RR, Iyengar P, Hennenfent AK, et al. Zika Virus  
829 Infection Among U.S. Pregnant Travelers - August 2015-February 2016. *MMWR Morb Mortal Wkly  
830 Rep*. 2016;65(8):211-4. Epub 2016/03/05. doi: 10.15585/mmwr.mm6508e1. PubMed PMID:  
831 26938703.
- 832 48. Jouannic JM, Friszer S, Leparc-Goffart I, Garel C, Eyrolle-Guignot D. Zika virus infection in  
833 French Polynesia. *Lancet*. 2016;387(10023):1051-2. Epub 2016/03/06. doi: 10.1016/S0140-  
834 6736(16)00625-5. PubMed PMID: 26944027.
- 835 49. Brasil P, Pereira JP, Jr., Raja Gabaglia C, Damasceno L, Wakimoto M, Ribeiro Nogueira RM, et  
836 al. Zika Virus Infection in Pregnant Women in Rio de Janeiro - Preliminary Report. *N Engl J Med*. 2016.  
837 Epub 2016/03/05. doi: 10.1056/NEJMoa1602412. PubMed PMID: 26943629.
- 838 50. Miranda-Filho Dde B, Martelli CM, Ximenes RA, Araujo TV, Rocha MA, Ramos RC, et al. Initial  
839 Description of the Presumed Congenital Zika Syndrome. *Am J Public Health*. 2016;106(4):598-600.  
840 Epub 2016/03/10. doi: 10.2105/AJPH.2016.303115. PubMed PMID: 26959258.
- 841 51. Tang H, Hammack C, Ogden SC, Wen Z, Qian X, Li Y, et al. Zika Virus Infects Human Cortical  
842 Neural Progenitors and Attenuates Their Growth. *Cell Stem Cell*. 2016;18(5):587-90. Epub  
843 2016/03/10. doi: 10.1016/j.stem.2016.02.016. PubMed PMID: 26952870.
- 844 52. Villamil-Gomez WE, Mendoza-Guete A, Villalobos E, Gonzalez-Arismendy E, Uribe-Garcia AM,  
845 Castellanos JE, et al. Diagnosis, management and follow-up of pregnant women with Zika virus  
846 infection: A preliminary report of the ZIKERNCOL cohort study on Sincelejo, Colombia. *Travel Med*

- 847 Infect Dis. 2016;14(2):155-8. Epub 2016/03/11. doi: 10.1016/j.tmaid.2016.02.004. PubMed PMID:  
848 26960750.
- 849 53. Kleber de Oliveira W, Cortez-Escalante J, De Oliveira WT, do Carmo GM, Henriques CM,  
850 Coelho GE, et al. Increase in Reported Prevalence of Microcephaly in Infants Born to Women Living in  
851 Areas with Confirmed Zika Virus Transmission During the First Trimester of Pregnancy - Brazil, 2015.  
852 MMWR Morb Mortal Wkly Rep. 2016;65(9):242-7. Epub 2016/03/11. doi:  
853 10.15585/mmwr.mm6509e2. PubMed PMID: 26963593.
- 854 54. Cauchemez S, Besnard M, Bompard P, Dub T, Guillemette-Artur P, Eyrolle-Guignot D, et al.  
855 Association between Zika virus and microcephaly in French Polynesia, 2013-15: a retrospective study.  
856 Lancet. 2016;387(10033):2125-32. Epub 2016/03/20. doi: 10.1016/S0140-6736(16)00651-6. PubMed  
857 PMID: 26993883; PubMed Central PMCID: PMC4909533.
- 858 55. Deng YQ, Zhao H, Li XF, Zhang NN, Liu ZY, Jiang T, et al. Isolation, identification and genomic  
859 characterization of the Asian lineage Zika virus imported to China. Sci China Life Sci. 2016;59(4):428-  
860 30. Epub 2016/03/20. doi: 10.1007/s11427-016-5043-4. PubMed PMID: 26993654.
- 861 56. Faria NR, Azevedo Rdo S, Kraemer MU, Souza R, Cunha MS, Hill SC, et al. Zika virus in the  
862 Americas: Early epidemiological and genetic findings. Science. 2016;352(6283):345-9. Epub  
863 2016/03/26. doi: 10.1126/science.aaf5036. PubMed PMID: 27013429; PubMed Central PMCID:  
864 PMC4918795.
- 865 57. Rossi SL, Tesh RB, Azar SR, Muruato AE, Hanley KA, Auguste AJ, et al. Characterization of a  
866 Novel Murine Model to Study Zika Virus. Am J Trop Med Hyg. 2016;94(6):1362-9. Epub 2016/03/30.  
867 doi: 10.4269/ajtmh.16-0111. PubMed PMID: 27022155; PubMed Central PMCID: PMC4889758.
- 868 58. Besnard M, Eyrolle-Guignot D, Guillemette-Artur P, Lastere S, Bost-Bezeaud F, Marcelis L, et  
869 al. Congenital cerebral malformations and dysfunction in fetuses and newborns following the 2013 to  
870 2014 Zika virus epidemic in French Polynesia. Euro Surveill. 2016;21(13). Epub 2016/03/31. doi:  
871 10.2807/1560-7917.ES.2016.21.13.30181. PubMed PMID: 27063794.
- 872 59. Driggers RW, Ho CY, Korhonen EM, Kuivanen S, Jaaskelainen AJ, Smura T, et al. Zika Virus  
873 Infection with Prolonged Maternal Viremia and Fetal Brain Abnormalities. N Engl J Med.  
874 2016;374(22):2142-51. Epub 2016/03/31. doi: 10.1056/NEJMoa1601824. PubMed PMID: 27028667.
- 875 60. Dowall SD, Graham VA, Rayner E, Atkinson B, Hall G, Watson RJ, et al. A Susceptible Mouse  
876 Model for Zika Virus Infection. PLoS Negl Trop Dis. 2016;10(5):e0004658. doi:  
877 10.1371/journal.pntd.0004658. PubMed PMID: 27149521; PubMed Central PMCID:  
878 PMC4858159.
- 879 61. Homan J, Malone RW, Darnell SJ, Bremel RD. Antibody mediated epitope mimicry in the  
880 pathogenesis of Zika virus related disease. bioRxiv. 2016. doi: 10.1101/044834.
- 881 62. Pan American Health Organization. Epidemiological Alert. Zika virus infection 24 March 2016.  
882 2016. Available from:  
883 [http://www.paho.org/hq/index.php?option=com\\_docman&task=doc\\_view&Itemid=270&gid=33937](http://www.paho.org/hq/index.php?option=com_docman&task=doc_view&Itemid=270&gid=33937)  
884 [http://www.paho.org/hq/index.php?option=com\\_docman&task=doc\\_view&Itemid=270&gid=33937](http://www.paho.org/hq/index.php?option=com_docman&task=doc_view&Itemid=270&gid=33937)  
&lang=en. [Last accessed 17.08.2016].
- 885 63. Pan American Health Organization. Epidemiological Alert. Zika virus infection 08 April 2016.  
886 2016. Available from:  
887 [http://www.paho.org/hq/index.php?option=com\\_docman&task=doc\\_view&Itemid=270&gid=34144](http://www.paho.org/hq/index.php?option=com_docman&task=doc_view&Itemid=270&gid=34144)  
888 [http://www.paho.org/hq/index.php?option=com\\_docman&task=doc\\_view&Itemid=270&gid=34144](http://www.paho.org/hq/index.php?option=com_docman&task=doc_view&Itemid=270&gid=34144)  
&lang=en. [Last accessed 17.08.2016].



- 889 64. Pan American Health Organization. Epidemiological Update. Zika virus infection - 28 April  
890 2016. 2016. Available from:  
891 [http://www.paho.org/hq/index.php?option=com\\_docman&task=doc\\_view&Itemid=270&gid=34327](http://www.paho.org/hq/index.php?option=com_docman&task=doc_view&Itemid=270&gid=34327)  
892 [http://www.paho.org/hq/index.php?option=com\\_docman&task=doc\\_view&Itemid=270&gid=34327](http://www.paho.org/hq/index.php?option=com_docman&task=doc_view&Itemid=270&gid=34327)  
&lang=en. [Last accessed 17.08.2016].
- 893 65. Pylro V, Oliveira F, Morais D, Orellana S, Pais F, Medeiros J, et al. Exploring miRNAs as the key  
894 to understand symptoms induced by ZIKA virus infection through a collaborative database. bioRxiv.  
895 2016. doi: 10.1101/042382.
- 896 66. Dudley DM, Aliota MT, Mohr EL, Weiler AM, Lehrer-Brey G, Weisgrau KL, et al. Natural  
897 history of Asian lineage Zika virus infection in macaques. bioRxiv. 2016. doi: 10.1101/046334.
- 898 67. Reefhuis J, Gilboa SM, Johansson MA, Valencia D, Simeone RM, Hills SL, et al. Projecting  
899 Month of Birth for At-Risk Infants after Zika Virus Disease Outbreaks. *Emerg Infect Dis.*  
900 2016;22(5):828-32. doi: 10.3201/eid2205.160290. PubMed PMID: 27088494; PubMed Central  
901 PMCID: PMC4861542.
- 902 68. European Centre for Disease Prevention and Control. Rapid risk assessment. Zika virus  
903 disease epidemic: potential association with microcephaly and Guillain-Barré syndrome. First update  
904 21 January 2016. 2016. Available from: [http://ecdc.europa.eu/en/publications/Publications/rapid-](http://ecdc.europa.eu/en/publications/Publications/rapid-risk-assessment-zika-virus-first-update-jan-2016.pdf)  
905 [risk-assessment-zika-virus-first-update-jan-2016.pdf](http://ecdc.europa.eu/en/publications/Publications/rapid-risk-assessment-zika-virus-first-update-jan-2016.pdf). [Last accessed 17.08.2016].
- 906 69. Zmurko J, Marques RE, Schols D, Verbeken E, Kaptein SJF, Neyts J. The viral polymerase  
907 inhibitor 7-deaza-2'-C-methyladenosine is a potent inhibitor of in vitro Zika virus replication and  
908 delays disease progression in a robust mouse infection model. *PLoS Negl Trop Dis.* 2016;10(5):no  
909 pagination. doi: 10.1101/041905.
- 910 70. Garcez PP, Loiola EC, Madeiro da Costa R, Higa LM, Trindade P, Delvecchio R, et al. Zika virus  
911 impairs growth in human neurospheres and brain organoids. *Science.* 2016;352(6287):816-8. Epub  
912 2016/04/12. doi: 10.1126/science.aaf6116. PubMed PMID: 27064148.
- 913 71. Nowakowski TJ, Pollen AA, Di Lullo E, Sandoval-Espinosa C, Bershteyn M, Kriegstein AR.  
914 Expression Analysis Highlights AXL as a Candidate Zika Virus Entry Receptor in Neural Stem Cells. *Cell*  
915 *Stem Cell.* 2016;18(5):591-6. Epub 2016/04/04. doi: 10.1016/j.stem.2016.03.012. PubMed PMID:  
916 27038591; PubMed Central PMCID: PMC4860115.
- 917 72. Hazin AN, Poretti A, Turchi Martelli CM, Huisman TA, Microcephaly Epidemic Research G, Di  
918 Cavalcanti Souza Cruz D, et al. Computed Tomographic Findings in Microcephaly Associated with Zika  
919 Virus. *N Engl J Med.* 2016;374(22):2193-5. Epub 2016/04/07. doi: 10.1056/NEJMc1603617. PubMed  
920 PMID: 27050112.
- 921 73. World Health Organization. Zika situation report. Zika virus, Microcephaly and Guillain-Barré  
922 syndrome - 07 April 2016. 2016. Available from: [http://www.who.int/emergencies/zika-](http://www.who.int/emergencies/zika-virus/situation-report/7-april-2016/en/)  
923 [virus/situation-report/7-april-2016/en/](http://www.who.int/emergencies/zika-virus/situation-report/7-april-2016/en/). [Last accessed 17.08.2016].
- 924 74. Pan American Health Organization. Epidemiological Alert. Zika virus infection 31 March 2016.  
925 2016. Available from:  
926 [http://www.paho.org/hq/index.php?option=com\\_docman&task=doc\\_view&Itemid=270&gid=34041](http://www.paho.org/hq/index.php?option=com_docman&task=doc_view&Itemid=270&gid=34041)  
927 [http://www.paho.org/hq/index.php?option=com\\_docman&task=doc\\_view&Itemid=270&gid=34041](http://www.paho.org/hq/index.php?option=com_docman&task=doc_view&Itemid=270&gid=34041)  
&lang=en. [Last accessed 17.08.2016].
- 928 75. Microcephaly Epidemic Research Group. Microcephaly in Infants, Pernambuco State, Brazil,  
929 2015. *Emerg Infect Dis.* 2016;22(6).

- 930 76. Campanati L, Higa LM, Delvecchio R, Pezzuto P, Valadão AL, Monteiro FL, et al. The Impact of  
931 African and Brazilian ZIKV isolates on neuroprogenitors. *bioRxiv*. 2016. doi: 10.1101/046599.
- 932 77. Lazear HM, Govero J, Smith AM, Platt DJ, Fernandez E, Miner JJ, et al. A Mouse Model of Zika  
933 Virus Pathogenesis. *Cell Host Microbe*. 2016;19(5):720-30. Epub 2016/04/14. doi:  
934 10.1016/j.chom.2016.03.010. PubMed PMID: 27066744; PubMed Central PMCID: PMC4866885.
- 935 78. Bayer A, Lennemann NJ, Ouyang Y, Bramley JC, Morosky S, Marques ET, Jr., et al. Type III  
936 Interferons Produced by Human Placental Trophoblasts Confer Protection against Zika Virus  
937 Infection. *Cell Host Microbe*. 2016;19(5):705-12. Epub 2016/04/14. doi: 10.1016/j.chom.2016.03.008.  
938 PubMed PMID: 27066743; PubMed Central PMCID: PMC4866896.
- 939 79. de Fatima Vasco Aragao M, van der Linden V, Brainer-Lima AM, Coeli RR, Rocha MA, Sobral  
940 da Silva P, et al. Clinical features and neuroimaging (CT and MRI) findings in presumed Zika virus  
941 related congenital infection and microcephaly: retrospective case series study. *BMJ*. 2016;353:i1901.  
942 Epub 2016/04/15. doi: 10.1136/bmj.i1901. PubMed PMID: 27075009; PubMed Central PMCID:  
943 PMC4830901.
- 944 80. Cavaleiro S, Lopez A, Serra S, Da Cunha A, da Costa MD, Moron A, et al. Microcephaly and  
945 Zika virus: neonatal neuroradiological aspects. *Childs Nerv Syst*. 2016;32(6):1057-60. Epub  
946 2016/04/16. doi: 10.1007/s00381-016-3074-6. PubMed PMID: 27080092; PubMed Central PMCID:  
947 PMC4882355.
- 948 81. Guillemette-Artur P, Besnard M, Eyrolle-Guignot D, Jouannic JM, Garel C. Prenatal brain MRI  
949 of fetuses with Zika virus infection. *Pediatr Radiol*. 2016;46(7):1032-9. Epub 2016/04/20. doi:  
950 10.1007/s00247-016-3619-6. PubMed PMID: 27090801.
- 951 82. Cordeiro MT, Pena LJ, Brito CA, Gil LH, Marques ET. Positive IgM for Zika virus in the  
952 cerebrospinal fluid of 30 neonates with microcephaly in Brazil. *Lancet*. 2016;387(10030):1811-2.  
953 Epub 2016/04/23. doi: 10.1016/S0140-6736(16)30253-7. PubMed PMID: 27103126.
- 954 83. Qian X, Nguyen HN, Song MM, Hadiono C, Ogden SC, Hammack C, et al. Brain-Region-Specific  
955 Organoids Using Mini-bioreactors for Modeling ZIKV Exposure. *Cell*. 2016;165(5):1238-54. Epub  
956 2016/04/28. doi: 10.1016/j.cell.2016.04.032. PubMed PMID: 27118425; PubMed Central PMCID:  
957 PMC4900885.
- 958 84. Paploski IA, Prates AP, Cardoso CW, Kikuti M, Silva MM, Waller LA, et al. Time Lags between  
959 Exanthematous Illness Attributed to Zika Virus, Guillain-Barre Syndrome, and Microcephaly, Salvador,  
960 Brazil. *Emerg Infect Dis*. 2016;22(8):1438-44. Epub 2016/05/05. doi: 10.3201/eid2208.160496.  
961 PubMed PMID: 27144515.
- 962 85. Noronha L, Zanluca C, Azevedo ML, Luz KG, Santos CN. Zika virus damages the human  
963 placental barrier and presents marked fetal neurotropism. *Mem Inst Oswaldo Cruz*. 2016;111(5):287-  
964 93. Epub 2016/05/05. doi: 10.1590/0074-02760160085. PubMed PMID: 27143490; PubMed Central  
965 PMCID: PMC4878297.
- 966 86. Moron AF, Cavaleiro S, Milani H, Sarmiento S, Tanuri C, de Souza FF, et al. Microcephaly  
967 associated with maternal Zika virus infection. *BJOG*. 2016;123(8):1265-9. Epub 2016/05/07. doi:  
968 10.1111/1471-0528.14072. PubMed PMID: 27150580.
- 969 87. Dang J, Tiwari SK, Lichinchi G, Qin Y, Patil VS, Eroshkin AM, et al. Zika Virus Depletes Neural  
970 Progenitors in Human Cerebral Organoids through Activation of the Innate Immune Receptor TLR3.

- 971 Cell Stem Cell. 2016;19(2):258-65. Epub 2016/05/11. doi: 10.1016/j.stem.2016.04.014. PubMed  
972 PMID: 27162029.
- 973 88. Wu KY, Zuo GL, Li XF, Ye Q, Deng YQ, Huang XY, et al. Vertical transmission of Zika virus  
974 targeting the radial glial cells affects cortex development of offspring mice. Cell Res. 2016;26(6):645-  
975 54. Epub 2016/05/14. doi: 10.1038/cr.2016.58. PubMed PMID: 27174054; PubMed Central PMCID:  
976 PMCPMC4897185.
- 977 89. Li C, Xu D, Ye Q, Hong S, Jiang Y, Liu X, et al. Zika Virus Disrupts Neural Progenitor  
978 Development and Leads to Microcephaly in Mice. Cell Stem Cell. 2016;19(1):120-6. Epub 2016/05/18.  
979 doi: 10.1016/j.stem.2016.04.017. PubMed PMID: 27179424.
- 980 90. Miner JJ, Cao B, Govero J, Smith AM, Fernandez E, Cabrera OH, et al. Zika Virus Infection  
981 during Pregnancy in Mice Causes Placental Damage and Fetal Demise. Cell. 2016;165(5):1081-91.  
982 Epub 2016/05/18. doi: 10.1016/j.cell.2016.05.008. PubMed PMID: 27180225; PubMed Central  
983 PMCID: PMCPMC4874881.
- 984 91. Culjat M, Darling SE, Nerurkar VR, Ching N, Kumar M, Min SK, et al. Clinical and Imaging  
985 Findings in an Infant With Zika Embryopathy. Clin Infect Dis. 2016. Epub 2016/05/20. doi:  
986 10.1093/cid/ciw324. PubMed PMID: 27193747.
- 987 92. Johansson MA, Mier-y-Teran-Romero L, Reefhuis J, Gilboa SM, Hills SL. Zika and the Risk of  
988 Microcephaly. N Engl J Med. 2016;375(1):1-4. Epub 2016/05/26. doi: 10.1056/NEJMp1605367.  
989 PubMed PMID: 27222919; PubMed Central PMCID: PMCPMC4945401.
- 990 93. Aliota MT, Caine EA, Walker EC, Larkin KE, Camacho E, Osorio JE. Characterization of Lethal  
991 Zika Virus Infection in AG129 Mice. PLoS Negl Trop Dis. 2016;10(4):e0004682. Epub 2016/05/24. doi:  
992 10.1371/journal.pntd.0004682. PubMed PMID: 27093158; PubMed Central PMCID:  
993 PMCPMC4836712.
- 994 94. Ventura CV, Maia M, Travassos SB, Martins TT, Patriota F, Nunes ME, et al. Risk Factors  
995 Associated With the Ophthalmoscopic Findings Identified in Infants With Presumed Zika Virus  
996 Congenital Infection. JAMA Ophthalmol. 2016. Epub 2016/05/27. doi:  
997 10.1001/jamaophthalmol.2016.1784. PubMed PMID: 27228275.
- 998 95. Miranda HA, 2nd, Costa MC, Frazao MA, Simao N, Franchischini S, Moshfeghi DM. Expanded  
999 Spectrum of Congenital Ocular Findings in Microcephaly with Presumed Zika Infection.  
1000 Ophthalmology. 2016;123(8):1788-94. Epub 2016/05/30. doi: 10.1016/j.ophtha.2016.05.001.  
1001 PubMed PMID: 27236271.
- 1002 96. Hanaoka MM, Kanas AF, Braconi CT, Mendes EA, Santos RA, Ferreira LCdS, et al. A Zika virus-  
1003 associated microcephaly case with background exposure to STORCH agents. bioRxiv. 2016:052340.  
1004 doi: 10.1101/052340.
- 1005 97. Garcez PP, Nascimento JM, Mota de Vasconcelos J, Madeiro da Costa R, Delvecchio R,  
1006 Trindade P, et al. Combined proteome and transcriptome analyses reveal that Zika virus  
1007 circulating in Brazil alters cell cycle and neurogenic programmes in human neurospheres. PeerJ  
1008 Preprints. 2016. doi: <https://doi.org/10.7287/peerj.preprints.2033v1>.
- 1009 98. Ganguly B, Ganguly E. Disruption of human astn2 function by ZIKV ns4b gene as a molecular  
1010 basis for Zika viral microcephaly. bioRxiv. 2016:054486. doi: 10.1101/054486.
- 1011 99. Frumence E, Roche M, Krejbich-Trotot P, El-Kalamouni C, Nativel B, Rondeau P, et al. The  
1012 South Pacific epidemic strain of Zika virus replicates efficiently in human epithelial A549 cells leading

- 1013 to IFN-beta production and apoptosis induction. *Virology*. 2016;493:217-26. doi:  
1014 10.1016/j.virol.2016.03.006. PubMed PMID: 27060565.
- 1015 100. Araujo TVB, Rodrigues LC, Ximenes RA, Miranda-Filho DB, Montarroyos UR, Melo APL, et al.  
1016 Microcephaly and Zika infection: Preliminary Report of a Case-Control Study. *Lancet*. 2016:In press.
- 1017 101. Gregg NM. Congenital Cataract Following German Measles in the Mother, 1941. *Epidemiol*  
1018 *Infect*. 1941;107(1):35-46.
- 1019 102. Cheeran MC, Lokensgard JR, Schleiss MR. Neuropathogenesis of congenital cytomegalovirus  
1020 infection: disease mechanisms and prospects for intervention. *Clin Microbiol Rev*. 2009;22(1):99-126,  
1021 Table of Contents. doi: 10.1128/CMR.00023-08. PubMed PMID: 19136436; PubMed Central PMCID:  
1022 PMC2620634.
- 1023 103. O'Leary DR, Kuhn S, Kniss KL, Hinckley AF, Rasmussen SA, Pape WJ, et al. Birth outcomes  
1024 following West Nile Virus infection of pregnant women in the United States: 2003-2004. *Pediatrics*.  
1025 2006;117(3):e537-45. doi: 10.1542/peds.2005-2024. PubMed PMID: 16510632.
- 1026 104. Pouliot SH, Xiong X, Harville E, Paz-Soldan V, Tomashek KM, Breart G, et al. Maternal dengue  
1027 and pregnancy outcomes: a systematic review. *Obstet Gynecol Surv*. 2010;65(2):107-18. doi:  
1028 10.1097/OGX.0b013e3181cb8fbc. PubMed PMID: 20100360.
- 1029 105. Franca GV, Schuler-Faccini L, Oliveira WK, Henriques CM, Carmo EH, Pedi VD, et al.  
1030 Congenital Zika virus syndrome in Brazil: a case series of the first 1501 livebirths with complete  
1031 investigation. *Lancet*. 2016. Epub 2016/07/04. doi: 10.1016/s0140-6736(16)30902-3. PubMed PMID:  
1032 27372398.
- 1033 106. Musso DG, D. J. Zika Virus. *Clin Microbiol Rev*. 2016;29(3):487-524. Epub 2016/04/01. doi:  
1034 10.1128/cmr.00072-15. PubMed PMID: 27029595.
- 1035 107. Duffy MR, Chen TH, Hancock WT, Powers AM, Kool JL, Lanciotti RS, et al. Zika virus outbreak  
1036 on Yap Island, Federated States of Micronesia. *N Engl J Med*. 2009;360(24):2536-43. Epub  
1037 2009/06/12. doi: 10.1056/NEJMoa0805715. PubMed PMID: 19516034.
- 1038 108. World Health Organization WHO. Zika situation report. Neurological syndrome and  
1039 congenital anomalies - 5 February 2016. 2016. Available from:  
1040 [http://apps.who.int/iris/bitstream/10665/204348/1/zikasitrep\\_5Feb2016\\_eng.pdf?ua=1](http://apps.who.int/iris/bitstream/10665/204348/1/zikasitrep_5Feb2016_eng.pdf?ua=1).
- 1041 109. Oehler E, Watrin L, Larre P, Leparc-Goffart I, Lastere S, Valour F, et al. Zika virus infection  
1042 complicated by Guillain-Barre syndrome--case report, French Polynesia, December 2013. *Euro*  
1043 *Surveill*. 2014;19(9). Epub 2014/03/15. PubMed PMID: 24626205.
- 1044 110. Institut de veille sanitaire. Virus Zika Polynésie 2013-2014, Ile de Yap, Micronésie 2007 -  
1045 Janvier 2014. 2014. Available from: <http://www.invs.sante.fr/Publications-et-outils/Points-epidemiologiques/Tous-les-numeros/International/Virus-Zika-en-Polynesie-2013-2014-et-ile-de-Yap-Micronesie-2007-Janvier-2014>. [Last accessed 17.8.16].
- 1048 111. Ios S, Mallet HP, Leparc Goffart I, Gauthier V, Cardoso T, Herida M. Current Zika virus  
1049 epidemiology and recent epidemics. *Med Mal Infect*. 2014;44(7):302-7. Epub 2014/07/09. doi:  
1050 10.1016/j.medmal.2014.04.008. PubMed PMID: 25001879.
- 1051 112. Pan American Health Organization. Epidemiological Update. Neurological syndrome,  
1052 congenital anomalies, and Zika virus infection - 17 January 2016. 2016. Available from:

- 1053 [http://www.paho.org/hq/index.php?option=com\\_docman&task=doc\\_view&Itemid=270&gid=32879](http://www.paho.org/hq/index.php?option=com_docman&task=doc_view&Itemid=270&gid=32879)  
1054 [http://www.paho.org/hq/index.php?option=com\\_docman&task=doc\\_view&Itemid=270&gid=32879](http://www.paho.org/hq/index.php?option=com_docman&task=doc_view&Itemid=270&gid=32879) &lang=en. [Last accessed 17.08.2016].
- 1055 113. Pan American Health Organization. Epidemiological Alert. Zika virus infection -3 March 2016.  
1056 2016. Available from:  
1057 [http://www.paho.org/hq/index.php?option=com\\_docman&task=doc\\_view&Itemid=270&gid=33486](http://www.paho.org/hq/index.php?option=com_docman&task=doc_view&Itemid=270&gid=33486)  
1058 [http://www.paho.org/hq/index.php?option=com\\_docman&task=doc\\_view&Itemid=270&gid=33486](http://www.paho.org/hq/index.php?option=com_docman&task=doc_view&Itemid=270&gid=33486) &lang=en. [Last accessed 17.08.2016].
- 1059 114. Pan American Health Organization. Epidemiological Alert. Zika virus infection -10 March  
1060 2016. 2016. Available from:  
1061 [http://www.paho.org/hq/index.php?option=com\\_docman&task=doc\\_view&Itemid=270&gid=33659](http://www.paho.org/hq/index.php?option=com_docman&task=doc_view&Itemid=270&gid=33659)  
1062 [http://www.paho.org/hq/index.php?option=com\\_docman&task=doc\\_view&Itemid=270&gid=33659](http://www.paho.org/hq/index.php?option=com_docman&task=doc_view&Itemid=270&gid=33659) &lang=en. [Last accessed 17.08.2016].
- 1063 115. Pan American Health Organization. Epidemiological Alert. Zika virus infection -17 March  
1064 2016. 2016. Available from:  
1065 [http://www.paho.org/hq/index.php?option=com\\_docman&task=doc\\_view&Itemid=270&gid=33768](http://www.paho.org/hq/index.php?option=com_docman&task=doc_view&Itemid=270&gid=33768)  
1066 [http://www.paho.org/hq/index.php?option=com\\_docman&task=doc\\_view&Itemid=270&gid=33768](http://www.paho.org/hq/index.php?option=com_docman&task=doc_view&Itemid=270&gid=33768) &lang=en. [Last accessed 16.08.2016].
- 1067 116. Pan American Health Organization. Epidemiological Update. Zika virus infection - 21 April  
1068 2016. 2016. Available from:  
1069 [http://www.paho.org/hq/index.php?option=com\\_docman&task=doc\\_view&Itemid=270&gid=34243](http://www.paho.org/hq/index.php?option=com_docman&task=doc_view&Itemid=270&gid=34243)  
1070 [http://www.paho.org/hq/index.php?option=com\\_docman&task=doc\\_view&Itemid=270&gid=34243](http://www.paho.org/hq/index.php?option=com_docman&task=doc_view&Itemid=270&gid=34243) &lang=en. [Last accessed 17.08.2016].
- 1071 117. Thomas DL, Sharp TM, Torres J, Armstrong PA, Munoz-Jordan J, Ryff KR, et al. Local  
1072 Transmission of Zika Virus--Puerto Rico, November 23, 2015-January 28, 2016. *MMWR Morb Mortal*  
1073 *Wkly Rep.* 2016;65(6):154-8. Epub 2016/02/20. doi: 10.15585/mmwr.mm6506e2. PubMed PMID:  
1074 26890470.
- 1075 118. Reyna-Villasmil E, Lopez-Sanchez G, Santos-Bolivar J. [Guillain-Barre syndrome due to Zika  
1076 virus during pregnancy]. *Med Clin (Barc).* 2016;146(7):331-2. Epub 2016/03/08. doi:  
1077 10.1016/j.medcli.2016.02.002. PubMed PMID: 26947168.
- 1078 119. Cao-Lormeau VM, Blake A, Mons S, Lastere S, Roche C, Vanhomwegen J, et al. Guillain-Barre  
1079 Syndrome outbreak associated with Zika virus infection in French Polynesia: a case-control study.  
1080 *Lancet.* 2016;387(10027):1531-9. Epub 2016/03/08. doi: 10.1016/S0140-6736(16)00562-6. PubMed  
1081 PMID: 26948433.
- 1082 120. Roze B, Najjioullah F, Ferge JL, Apetse K, Brouste Y, Cesaire R, et al. Zika virus detection in  
1083 urine from patients with Guillain-Barre syndrome on Martinique, January 2016. *Euro Surveill.*  
1084 2016;21(9). Epub 2016/03/12. doi: 10.2807/1560-7917.ES.2016.21.9.30154. PubMed PMID:  
1085 26967758.
- 1086 121. Lucchese G, Kanduc D. Zika virus and autoimmunity: From microcephaly to Guillain-Barre  
1087 syndrome, and beyond. *Autoimmun Rev.* 2016;15(8):801-8. Epub 2016/03/29. doi:  
1088 10.1016/j.autrev.2016.03.020. PubMed PMID: 27019049.
- 1089 122. Craig AT, Butler MT, Pastore R, Paterson BJ, Durrheim DN. Update on Zika virus transmission  
1090 in the Pacific islands, 2007 to February 2016 and failure of acute flaccid paralysis surveillance to  
1091 signal Zika emergence in this setting. *Bull World Health Organ.* 2016. doi: 10.2471/blt.16.171892.
- 1092 123. Watrin L, Ghawche F, Larre P, Neau JP, Mathis S, Fournier E. Guillain-Barre Syndrome (42  
1093 Cases) Occurring During a Zika Virus Outbreak in French Polynesia. *Medicine (Baltimore).*



- 1094 2016;95(14):e3257. Epub 2016/04/09. doi: 10.1097/MD.0000000000003257. PubMed PMID:  
1095 27057874.
- 1096 124. Fontes CA, Dos Santos AA, Marchiori E. Magnetic resonance imaging findings in Guillain-Barre  
1097 syndrome caused by Zika virus infection. *Neuroradiology*. 2016. Epub 2016/04/14. doi:  
1098 10.1007/s00234-016-1687-9. PubMed PMID: 27067205.
- 1099 125. Brasil P, Sequeira PC, Freitas AD, Zogbi HE, Calvet GA, de Souza RV, et al. Guillain-Barre  
1100 syndrome associated with Zika virus infection. *Lancet*. 2016;387(10026):1482. Epub 2016/04/27. doi:  
1101 10.1016/S0140-6736(16)30058-7. PubMed PMID: 27115821.
- 1102 126. Kassavetis P, Joseph JM, Francois R, Perloff MD, Berkowitz AL. Zika virus-associated Guillain-  
1103 Barre syndrome variant in Haiti. *Neurology*. 2016;87(3):336-7. Epub 2016/05/11. doi:  
1104 10.1212/WNL.0000000000002759. PubMed PMID: 27164708.
- 1105 127. Duijster JW, Goorhuis A, van Genderen PJ, Visser LG, Koopmans MP, Reimerink JH, et al. Zika  
1106 virus infection in 18 travellers returning from Surinam and the Dominican Republic, The Netherlands,  
1107 November 2015-March 2016. *Infection*. 2016. Epub 2016/05/23. doi: 10.1007/s15010-016-0906-y.  
1108 PubMed PMID: 27209175.
- 1109 128. van den Berg B, van den Beukel JC, Alsmas J, van der Eijk AA, Ruts L, van Doorn PA, et al.  
1110 [Guillain-Barre syndrome following infection with the Zika virus]. *Ned Tijdschr Geneeskd*.  
1111 2016;160(0):D155. Epub 2016/05/28. PubMed PMID: 27229696.
- 1112 129. Yung CFT, K. C. Guillain-Barre Syndrome and Zika Virus: Estimating Attributable Risk to Inform  
1113 Intensive Care Capacity Preparedness. *Clin Infect Dis*. 2016. Epub 2016/05/27. doi:  
1114 10.1093/cid/ciw355. PubMed PMID: 27225243.
- 1115 130. Jackson BR, Zegarra JA, Lopez-Gatell H, Sejvar J, Arzate F, Waterman S, et al. Binational  
1116 outbreak of Guillain-Barre syndrome associated with *Campylobacter jejuni* infection, Mexico and  
1117 USA, 2011. *Epidemiol Infect*. 2014;142(5):1089-99. doi: 10.1017/S0950268813001908. PubMed  
1118 PMID: 23924442.
- 1119 131. McCarthy N, Giesecke J. Incidence of Guillain-Barre syndrome following infection with  
1120 *Campylobacter jejuni*. *Am J Epidemiol*. 2001;153(6):610-4. PubMed PMID: 11257070.
- 1121 132. Tam CC, Rodrigues LC, Petersen I, Islam A, Hayward A, O'Brien SJ. Incidence of Guillain-Barre  
1122 syndrome among patients with *Campylobacter* infection: a general practice research database study.  
1123 *J Infect Dis*. 2006;194(1):95-7. doi: 10.1086/504294. PubMed PMID: 16741887.
- 1124 133. Rees JH, Soudain SE, Gregson NA, Hughes RA. *Campylobacter jejuni* infection and Guillain-  
1125 Barre syndrome. *N Engl J Med*. 1995;333(21):1374-9. doi: 10.1056/NEJM199511233332102. PubMed  
1126 PMID: 7477117.
- 1127 134. Mishu B, Blaser MJ. Role of infection due to *Campylobacter jejuni* in the initiation of Guillain-  
1128 Barre syndrome. *Clin Infect Dis*. 1993;17(1):104-8. PubMed PMID: 8353228.
- 1129 135. Carod-Artal FJ, Wichmann O, Farrar J, Gascon J. Neurological complications of dengue virus  
1130 infection. *Lancet Neurol*. 2013;12(9):906-19. Epub 2013/08/21. doi: 10.1016/S1474-4422(13)70150-  
1131 9. PubMed PMID: 23948177.
- 1132 136. Sejvar JJ, Bode AV, Marfin AA, Campbell GL, Ewing D, Mazowiecki M, et al. West Nile virus-  
1133 associated flaccid paralysis. *Emerg Infect Dis*. 2005;11(7):1021-7. doi: 10.3201/eid1107.040991.  
1134 PubMed PMID: 16022775; PubMed Central PMCID: PMC3371783.

- 1135 137. Xiang JY, Zhang YH, Tan ZR, Huang J, Zhao YW. Guillain-Barre syndrome associated with  
1136 Japanese encephalitis virus infection in China. *Viral Immunol.* 2014;27(8):418-20. doi:  
1137 10.1089/vim.2014.0049. PubMed PMID: 25140441.
- 1138 138. Ravi V, Taly AB, Shankar SK, Shenoy PK, Desai A, Nagaraja D, et al. Association of Japanese  
1139 encephalitis virus infection with Guillain-Barre syndrome in endemic areas of south India. *Acta*  
1140 *Neurol Scand.* 1994;90(1):67-72. PubMed PMID: 7941960.
- 1141 139. McMahan AW, Eidex RB, Marfin AA, Russell M, Sejvar JJ, Markoff L, et al. Neurologic disease  
1142 associated with 17D-204 yellow fever vaccination: a report of 15 cases. *Vaccine.* 2007;25(10):1727-  
1143 34. doi: 10.1016/j.vaccine.2006.11.027. PubMed PMID: 17240001.
- 1144 140. Solomon T, Kneen R, Dung NM, Khanh VC, Thuy TT, Ha DQ, et al. Poliomyelitis-like illness due  
1145 to Japanese encephalitis virus. *Lancet.* 1998;351(9109):1094-7. doi: 10.1016/S0140-6736(97)07509-  
1146 0. PubMed PMID: 9660579.
- 1147 141. Chung CC, Lee SS, Chen YS, Tsai HC, Wann SR, Kao CH, et al. Acute flaccid paralysis as an  
1148 unusual presenting symptom of Japanese encephalitis: a case report and review of the literature.  
1149 *Infection.* 2007;35(1):30-2. doi: 10.1007/s15010-007-6038-7. PubMed PMID: 17297587.
- 1150 142. Argall KG, Armati PJ, King NJ, Douglas MW. The effects of West Nile virus on major  
1151 histocompatibility complex class I and II molecule expression by Lewis rat Schwann cells in vitro. *J*  
1152 *Neuroimmunol.* 1991;35(1-3):273-84. PubMed PMID: 1955569.
- 1153 143. Loshaj-Shala A, Regazzoni L, Daci A, Orioli M, Brezovska K, Panovska AP, et al. Guillain Barre  
1154 syndrome (GBS): new insights in the molecular mimicry between *C. jejuni* and human peripheral  
1155 nerve (HPN) proteins. *J Neuroimmunol.* 2015;289:168-76. doi: 10.1016/j.jneuroim.2015.11.005.  
1156 PubMed PMID: 26616887.
- 1157 144. Meyer Sauter PM, Huizinga R, Tio-Gillen AP, Roodbol J, Hoogenboezem T, Jacobs E, et al.  
1158 *Mycoplasma pneumoniae* triggering the Guillain-Barre syndrome: A case-control study. *Ann Neurol.*  
1159 2016. doi: 10.1002/ana.24755. PubMed PMID: 27490360.
- 1160 145. Tseng YF, Wang CC, Liao SK, Chuang CK, Chen WJ. Autoimmunity-related demyelination in  
1161 infection by Japanese encephalitis virus. *J Biomed Sci.* 2011;18:20. doi: 10.1186/1423-0127-18-20.  
1162 PubMed PMID: 21356046; PubMed Central PMCID: PMC3056755.
- 1163 146. Dejnirattisai W, Supasa P, Wongwiwat W, Rouvinski A, Barba-Spaeth G, Duangchinda T, et al.  
1164 Dengue virus sero-cross-reactivity drives antibody-dependent enhancement of infection with zika  
1165 virus. *Nat Immunol.* 2016. Epub 2016/06/25. doi: 10.1038/ni.3515. PubMed PMID: 27339099.
- 1166 147. Paul LM, Carlin ER, Jenkins MM, Tan AL, Barcellona CM, Nicholson CO, et al. Dengue Virus  
1167 Antibodies Enhance Zika Virus Infection. *bioRxiv.* 2016:050112. doi: 10.1101/050112.
- 1168 148. World Health Organization. Pregnancy management in the context of Zika virus infection.  
1169 Interim guidance update. Geneva: World Health Organization, 2016. Available from:  
1170 <http://www.who.int/csr/resources/publications/zika/pregnancy-management/en/>. [Last accessed  
1171 18.08.2016].
- 1172 149. Rothman KJ, Greenland S. Causation and causal inference in epidemiology. *Am J Public*  
1173 *Health.* 2005;95 Suppl 1:S144-50. doi: 10.2105/AJPH.2004.059204. PubMed PMID: 16030331.
- 1174 150. Rothman KJ. *Causes.* *Am J Epidemiol.* 1976;104(6):587-92. PubMed PMID: 998606.

- 1175 151. Vandenbroucke JP. Case reports in an evidence-based world. *J R Soc Med*. 1999;92(4):159-63.  
1176 PubMed PMID: 10450190; PubMed Central PMCID: PMC1297135.
- 1177 152. Solomon T, Baylis M, Brown D. Zika virus and neurological disease-approaches to the  
1178 unknown. *Lancet Infect Dis*. 2016. Epub 2016/03/01. doi: 10.1016/s1473-3099(16)00125-0. PubMed  
1179 PMID: 26923117.
- 1180 153. Ribeiro LS, Marques RE, Jesus AM, Almeida RP, Teixeira MM. Zika crisis in Brazil: challenges in  
1181 research and development. *Curr Opin Virol*. 2016;18:76-81. Epub 2016/05/18. doi:  
1182 10.1016/j.coviro.2016.04.002. PubMed PMID: 27179929.
- 1183 154. Aiken AR, Scott JG, Gomperts R, Trussell J, Worrell M, Aiken CE. Requests for Abortion in  
1184 Latin America Related to Concern about Zika Virus Exposure. *N Engl J Med*. 2016;375(4):396-8. doi:  
1185 10.1056/NEJMc1605389. PubMed PMID: 27331661.
- 1186 155. Haug CJ, Kieny MP, Murgue B. The Zika Challenge. *N Engl J Med*. 2016;374(19):1801-3. Epub  
1187 2016/03/31. doi: 10.1056/NEJMp1603734. PubMed PMID: 27028782.
- 1188 156. Evans DN, Fred; Parens, Raphael; Morales, Alfredo J.; Bar-Yam, Yaneer. A Possible Link  
1189 Between Pyriproxyfen and Microcephaly. arXiv. 2016.
- 1190 157. Triunfol M. Microcephaly in Brazil: confidence builds in Zika connection. *Lancet Infect Dis*.  
1191 2016;16(5):527-8. doi: 10.1056/NEJMoa1602412. PubMed PMID: WOS:000374272900019.
- 1192 158. Stockman LJ, Bellamy R, Garner P. SARS: systematic review of treatment effects. *PLoS Med*.  
1193 2006;3(9):e343. doi: 10.1371/journal.pmed.0030343. PubMed PMID: 16968120; PubMed Central  
1194 PMCID: PMC1564166.
- 1195 159. Schunemann HJ, Hill SR, Kakad M, Bellamy R, Uyeki TM, Hayden FG, et al. WHO Rapid Advice  
1196 Guidelines for pharmacological management of sporadic human infection with avian influenza A  
1197 (H5N1) virus. *Lancet Infect Dis*. 2007;7(1):21-31. doi: 10.1016/S1473-3099(06)70684-3. PubMed  
1198 PMID: 17182341.
- 1199 160. Elliott JH, Turner T, Clavisi O, Thomas J, Higgins JPT, Mavergames C, et al. Living Systematic  
1200 Reviews: An Emerging Opportunity to Narrow the Evidence-Practice Gap. *PLoS Med*. 2014;11(2):1--6.  
1201 doi: 10.1371/journal.pmed.1001603. PubMed PMID: Elliott2014.
- 1202 161. Tracz V, Lawrence R. Towards an open science publishing platform. *F1000Res*. 2016;5:130.  
1203 doi: 10.12688/f1000research.7968.1. PubMed PMID: 26962436; PubMed Central PMCID:  
1204 PMC1564166.
- 1205 162. Modjarrad K, Moorthy VS, Millett P, Gsell PS, Roth C, Kieny MP. Developing Global Norms for  
1206 Sharing Data and Results during Public Health Emergencies. *PLoS Med*. 2016;13(1):e1001935. doi:  
1207 10.1371/journal.pmed.1001935. PubMed PMID: 26731342; PubMed Central PMCID:  
1208 PMC1564166.
- 1209



## Supporting information captions

### As separate files

**S1 Text.** Background to assessment of causality in epidemiology, Zika causality framework questions, supplementary methods and results. Includes S1 Table, S2 Table, S3 Table, S1 Figure, S2 Figure, S3 Figure

**S4 Table.** S4a Table, causality framework evidence for congenital brain abnormalities; S4b Table, quality assessment of evidence about congenital brain abnormalities

**S5 Table.** S5a Table, causality framework evidence for Guillain-Barré syndrome; S5b Table, quality assessment, body of evidence
